1 Boundary Strength Analysis: Combining colour pattern geometry and coloured patch visual properties for use  
2 in predicting behaviour and fitness

3  
4 John A. Endler, Gemma L. Cole and Alexandra Kranz

5  
6 Centre for Integrative Ecology, School of Life & Environmental Sciences, Deakin University, Waurn Ponds

7  
8 Corresponding author: John A. Endler, [John.Endler@deakin.edu.au](mailto:John.Endler@deakin.edu.au)

9  
10 Running head: Combining colour geometry with visual properties

11

12 Abstract:

13  
14 1. Colour patterns are used by many species to make decisions that ultimately affect their Darwinian fitness.  
15 Colour patterns consist of a mosaic of patches that differ in geometry and visual properties. Although  
16 traditionally pattern geometry and colour patch visual properties are analysed separately, these components are  
17 likely to work together as a functional unit. Despite this, the combined effect of patch visual properties, patch  
18 geometry, and the effects of the patch boundaries on animal visual systems, behaviour and fitness are relatively  
19 unexplored.

20  
21 2. Here we describe Boundary Strength Analysis (BSA), a novel way to combine the geometry of the edges  
22 (boundaries among the patch classes) with the receptor noise estimate ( $\Delta S$ ) of the intensity of the edges. The  
23 method is based upon known properties of vertebrate and invertebrate retinas. The mean and SD of  $\Delta S$  ( $m_{\Delta S}$ ,  
24  $s_{\Delta S}$ ) of a colour pattern can be obtained by weighting each edge class  $\Delta S$  by its length, separately for chromatic  
25 and achromatic  $\Delta S$ . This assumes those colour patterns, or parts of the patterns used in signalling, with larger  
26  $m_{\Delta S}$  and  $s_{\Delta S}$  are more stimulating and hence more salient to the viewers. BSA can be used to examine both  
27 colour patterns and visual backgrounds.

28  
29 3. BSA was successful in assessing the estimated conspicuousness of colour pattern variants in two species,  
30 guppies (*Poecilia reticulata*) and Gouldian finches (*Erythrura gouldiae*), both polymorphic for patch colour,  
31 luminance and geometry. 3D representations of the  $\Delta S$  of patch edges (Fort Diagrams) of both species show  
32 that there is little or negative geometric correspondence between the chromatic and achromatic edges. All  
33 individuals have  $m_{\Delta S} > 1.5$  for both chromatic and achromatic measures, indicating the high within-pattern  
34 contrast expected for display signals. In contrast from what one would expect from sexual selection, all  
35 guppies have  $m_{\Delta S}$  less than expected from random contacts between all pairs of patch colour/luminance classes.  
36 The correlation between chromatic and luminance  $\Delta S$  is negative in both species but zero when correlating all  
37 possible kinds of edges between the colours of each species and morph indicating non-random colour geometry.

38  
39 4. The pattern difference between chromatic and achromatic edges in both species reveals the possibility that  
40 chromatic and achromatic edges could function differently. The smaller than random expected  $m_{\Delta S}$  values in  
41 guppies suggests an anti-predator function because guppies are never found without predators. Moreover,  $m_{\Delta S}$   
42 could vary with predation intensity within and among species. BSA can be applied to any colour pattern used in  
43 intraspecific and interspecific behaviour. Seven predictions and four questions about colour patterns are  
44 presented.

45  
46 5. In species which are very convex, both chromatic and luminance  $m_{\Delta S}$  change with viewing angle; geometry  
47 of signalling is as important as signal geometry.

48  
49 Key words: boundary strength analysis; colour pattern analysis, colour transitions, conspicuousness, fort  
50 diagrams, pattern edges, receptor noise, visual signals

51  
52  
53  
54  
55  
56  
57  
58  
59  
60  
61  
62  
63  
64  
65  
66  
67  
68  
69  
70  
71  
72  
73  
74  
75  
76  
77  
78  
79  
80  
81  
82  
83  
84  
85  
86  
87  
88  
89  
90

## 1. INTRODUCTION

Colour patterns are important in survival and reproduction in diverse species because they affect mating success, contests, avoiding predators, luring prey or attracting pollinators. In general, the fitness of the sender (individual with the colour pattern) is affected because the receiver (viewer of the colour pattern) can make a behavioural or physiological decision about the sender, based upon reception and perception of the sender's colour pattern (e.g. receivers will mate, fight, attack, be lured close and eaten, pollinate or disperse seeds). Colour patterns offer an effective way of investigating the complex relationship between genes, morphology, performance, fitness and evolution (Arnold 1983, 2003) because the functions of most colour patterns are relatively easy to identify (Endler 1978, 1980). However, the links between visual properties, perception, receivers' decision-making processes and fitness are not well understood.

Decisions made by the receiver depend upon both the signal design of the colour pattern (the physical structure of the signal) and its signal content (information about the signaller, reviewed in Endler 1993a). For both components, the first stage affecting fitness is the stimulation of the receiver's retina by the colour pattern; all subsequent processes leading to perception and decision making flow through this step (Lythgoe 1979). Although all components of a colour pattern may affect the viewer's decision making, their relative importance in retinal and brain stimulation is not known. In particular, we do not know how colour, luminance, patch size and patch geometry work together to affect receiver behaviour, and so cannot yet make explicit predictions about colour pattern properties or the behavioural decisions based upon them.

Relating patterns to fitness has been successful for some species with cryptic colour pattern components (Troschianko et al 2016, 2017) but there is a tendency in the literature to study only pattern or one or two colour pattern components. Previous attempts to quantify colour patterns have included mapping the pattern components (Van Belleghem et al 2018), mapping pattern component boundaries (Stevens and Cuthill 2006) and estimating the distributions of relative pattern component edge lengths (Endler 2012). Other analyses have calculated colour patch discriminability (Siddiqi et al 2004). However, all of these methods ignore whether or not the colour patches share common boundaries. Color patch boundaries are important because adjacent colour patches will influence the visual perception of a given patch as well as the contrast across the boundary.

Here we present Boundary Strength Analysis (BSA), a way to combine the effects of both patch properties and the intensity of patch edges (transitions between patches) based upon how they are processed by the visual system in the retina. BSA estimates the effects of both colour and patch edges by combining two existing methods for the first time, one for discriminability between adjacent patches ( $\Delta S$  Vorobyev and Osorio 1998) and one for the geometric arrangement of patches (Endler 2012). Unlike all previous methods, BSA includes the estimated visual intensity of the boundaries (estimated by  $\Delta S$ ) and their length, rather than just recording which boundaries are present, and calculates  $\Delta S$  statistics only between patches which come in contact. This is consistent with the opponent visual processes that detect colour and colour patch edges, and the fact that these

91 processes sample small parts of the visual field (Dowling 2012, Kelber 2016). This allows us to begin to  
92 examine colour patterns less arbitrarily, by incorporating estimates of how strongly patch boundaries stimulate  
93 the retina as a proxy for conspicuousness.

94  
95 BSA can be used for animal and plant colour patterns as well as visual backgrounds, and allows  
96 investigation of both within pattern and pattern-background contrast. For brevity we will describe and give  
97 examples of BSA in terms of within-pattern contrast but the resulting statistics can be calculated for visual  
98 backgrounds as well as patterns and the two compared to estimate pattern-background contrast.

## 100 101 1.2 VISUAL MODELLING OF COLOUR DISCRIMINATION

102  
103 We use the receptor noise model or RN (Vorobyev and Osorio 1998; reviewed in Kelber et al 2003) to  
104 estimate detection thresholds for colour discrimination. The input to the model consists of the relative light  
105 (photon) captures for each photoreceptor class in the viewer's retina for two colour patches. The output of the  
106 RN model is  $\Delta S$ , which is similar to a multivariate equivalent to  $t$  in statistics in that it compares the difference  
107 between the two sets of cone captures to the standard error of the difference. Like other signal/noise measures  
108  $\Delta S = 1$  is regarded as the difference required for two colours to be noticeable, or one just noticeable difference  
109 (JND). RN predictions have been tested using behaviour of several species, and work reasonably well (e.g.  
110 Kelber et al 2003; Olsson et al 2015; Fleishman et al 2016). However, RN modelling must be used with caution  
111 for four reasons: (1) RN was designed to predict discrimination when  $\Delta S$  is near one (near the threshold), and  
112 may be inaccurate for colours that are very different ( $\Delta S > 1$ ). This arises because the relationship between  
113 predicted difference and perceived difference is nonlinear. For example, consider three colours A, B, and C. Let  
114 the difference between A and B be  $\Delta S = 2$ , and between A and C  $\Delta S = 8$ ; the frequent implicit assumption is that  
115  $\Delta S = 6$  between B and C. Although the JND scale suggests that A and B are almost as far apart as A and C, if  
116 the perception response to  $\Delta S$  is logarithmic then B and C may not be perceived as very different from each  
117 other and both perceived as very different from A. (2) Behaviour observations often show that some colours are  
118 discriminated as predicted by RN while others are not (unpublished observations; Cheney, pers. comm 2017;  
119 Olsson et al 2015; Fleishman et al 2016). This may arise from pre-existing colour preferences. Different RN  
120 models need to be used at higher and lower light intensities to make good predictions (Vorobyev and Osorio  
121 1998, Olsson et al 2015). (3) Data on actual receptor noise values are scarce yet they underpin all  $\Delta S$   
122 calculations (Olsson et al 2017). (4) The model is limited; it is designed to capture what happens during early  
123 processing in the retina and does not include downstream processing in the brain, including decision making as  
124 well as perception. Estimates of detection and discrimination depend upon animals making decisions.  
125 Consequently, the RN could be correct in the retina, but later neural processes may mean that behaviour-tests  
126 may not match all RN predictions (for example Dyer et al 2008). Despite these limitations, what happens at the  
127 early retinal level is important because all visual processing starts there (Lythgoe 1979). The RN model must be  
128 treated simply as a starting point analogous to the Hardy-Weinberg equilibrium in population genetics. In  
129 addition to providing a foundation, RN model estimates of  $\Delta S$  can be used to explore the visual effect of the  
130 entire colour pattern, not just differences between colour pairs.

131  
132  
133  
134 1.3 ASSESSMENT OF PATCH EDGES  
135

136 Previous work with colour discrimination and  $\Delta S$  has not accounted for whether compared patches were in  
137 contact or separated by other colours. Here we explore  $\Delta S$  explicitly for patches which come into contact  
138 because what happens at the patch edges may be important. The neurobiological justification for assessing the  
139 effects of edges (transitions between patches) is described in detail in Elder and Sachs (2004), Stevens and  
140 Cuthill (2006), Troscianko et al (2017) and Endler (2012). Briefly, the photoreceptors in both vertebrate and  
141 invertebrate visual systems are connected to neurons that calculate the differences between the photoreceptor  
142 outputs over a small visual field. Groups of photoreceptors involved in opponency are called units and can not  
143 only detect colour but also serve as edge detectors. Units consist of two adjacent groups (zones) of  
144 photoreceptors covering a small part of the visual field, and a ganglion cell calculates the difference in outputs  
145 between the two groups opponency (Dowling 2012; Dyer et al 2011; Kelber 2016; Sanes and Zipursky 2010). If  
146 the photoreceptors in the two zones are sensitive to *different* wavelengths, then the unit outputs are colour  
147 signals because colour is based upon intensity differences among different parts of the visible spectrum. Edges  
148 between patches of different colours are detected if the edge cuts across the boundary between the unit zones. If  
149 the photoreceptors in the unit are sensitive to the *same* wavelengths then the outputs result from patch edges at  
150 the zone boundary regardless of chroma if they differ in luminance. Both edge types are detected depending  
151 upon the physical size of the retinal unit relative to the image and/or how rapidly the eye scans the colour  
152 pattern (Elder and Sachs 2004; Dowling 2012; Gegenfurtner and Sharpe 1999; Kelber 2016; Sanes and Zipursky  
153 2010). The stronger the edges (steeper gradients and greater differences between the patches, yielding larger  $\Delta S$   
154 between the two patches) the stronger the signal they produce in the units. The longer the edges the more units  
155 that they will stimulate. Consequently, both the geometry and reflectance spectra of patches in colour patterns  
156 affect edge intensity and conspicuousness. Both chromatic and achromatic opponent units operate over small  
157 parts of the visual field, suggesting that local colour pattern properties may be more important than global  
158 properties.

159  
160 The effects of edges also depend upon the visual acuity (resolution angle) of the viewer as well as the  
161 distance between the viewer and the colour pattern. Acuity effects may eliminate or modify visual contrast,  
162 particularly if the visual fields of the opponent units are larger than the patches. Although opponent units are  
163 known to cover a small part of the visual field, their actual sizes are unknown in most species. Moreover there  
164 may be higher-order units in the brain which will not be accounted for by the retinal estimations. For these  
165 reasons, calculations of edge effects must be done with good data on acuity and viewing distance, and results  
166 treated as a first approximation, even if the unit field sizes are known.

167  
168  
169 2 METHODS  
170

171 Let  $C$  be the number of colour and luminance classes in a given colour pattern. The challenge of this, and  
172 any other colour pattern analysis, is identifying the  $C$  classes and making identification repeatable. This is a  
173 classic image analysis problem known as image segmentation, and is particularly problematic where there are  
174 colour or luminance gradients. One could identify the classes by (human) eye, but for almost all diurnal non-  
175 primate animals their vision is sufficiently different from humans that human-based classifications may range  
176 from unreliable to misleading, particularly if there are UV reflecting patches present. Another method is to  
177 move a portable reflectance spectrometer sensor over the animal's body to determine how patch reflectance  
178 spectra vary. If any of the spectra vary more than is visible to the human eye then samples must be taken from  
179 both the invisible and visible patches and labelled accordingly. A third method which is less likely to miss  
180 patches invisible to humans is to scan the entire body evenly in a grid with a spectrometer and use various  
181 clustering methods to classify the colour/luminance patches by spectral clusters. This can be refined by doing  
182 clustering of calibrated photographic pixels (Van Belleghem et al 2018), spectra or cone stimulations and  
183 clustering based upon  $\Delta S$  (van den Berg et al, in preparation). A final stage is ensuring that all patches in the  
184 segmented image are visible with the viewer's visual acuity and viewing distance. In what follows, we will  
185 assume that the patch classification into  $C$  classes has been completed along with a matching list of cone  
186 captures estimated from patch spectra (Endler & Mielke 2015) or from calibrated photographs (Troscianko and  
187 Stevens 2015).

188  
189 All cone capture estimates should be made under the normal viewing conditions in the wild. This includes  
190 the distances between signals and receivers as well as light intensity because visual acuity declines with  
191 declining light and the combination of the visual acuity of the viewer and the viewing distance affects the  
192 smallest patch which can be resolved. If two patches are not resolved at the ordinary distance and light  
193 intensity, then the two patches should be combined into a single patch and the patch spectrum should be an  
194 average of the two spectra, weighted at each wavelength by the relative areas of the two indistinguishable  
195 patches. The geometry of patches should be relevant to the viewer's vision and visual conditions during  
196 viewing.

## 197 198 199 2.1 RELATIVE FREQUENCY OF EACH PATCH EDGE CLASS

200  
201 The first stage of analysis of a colour pattern is to estimate the lengths or relative frequencies of the  $C$  edges  
202 between adjacent colour/luminance patch classes. A  $C \times C$  matrix should be made to organise the list of all  
203 possible edge or colour/luminance transition classes (example in supplemental table S1). For  $C$  classes there are  
204 at most  $E = C(C-1)/2$  different edge or transition classes (Endler 2012). Note that in any one colour pattern it is  
205 likely that not all patch classes will contact all other classes, especially for larger  $C$ . Consequently, the number  
206 of observed kinds of different transitions (edges) among patches,  $n$ , will be less than the maximum possible  
207 number of edge classes,  $E$ . A simple example is found in the North American coral snakes *Micrurus fulvius* and  
208 *M. euryxanthus*, where there are colloquial phrases to distinguish them from the Batesian mimetic king snakes  
209 (*Lampropeltis*) such as "red on yellow, beware the fellow, red on black, it's all right Jack". There are three  
210 possible transitions in these snakes: red-yellow, yellow-black and red-black, but red-black is a missing transition

211 in these coral snakes while and red-yellow is missing from the mimics (this is not true for other coral snake  
212 species). Once the edge classes are determined, they need to be mapped onto the outline of the animal. An  
213 example using a male guppy (*Poecilia reticulata*) is shown in Fig. 1A-C.

214  
215 The relative frequency or length of each transition class can be obtained from one of two methods.  
216 Measure the length for each edge directly from the edge map (Fig. 1C) or extract edges from the zone map of  
217 the patch pattern. A zone map is simply a digital mosaic diagram of the same size as the original image where  
218 each pixel contains a label for the colour/luminance class in which it is found (Fig. 1B); this is also known as a  
219 label matrix. The zone map also allows additional parameters to be extracted (Endler 2012). Because pixels are  
220 in a square array, diagonal distances as well as horizontal or vertical distances will have to be used for slanted  
221 edges, but this should produce minor errors if the pixel spacing is small enough. Accumulating the  
222 colour/luminance class transitions over all adjacent pixels in the zone map yields a transition or adjacency  
223 matrix, where rows and columns correspond to the colour classes (as in table S1). The transition matrix  
224 diagonal entries are proportional to each colour's relative area. The off-diagonals yield the relative frequency of  
225 each transition class or edge (Endler 2012). This matrix is symmetric with separate estimates of a particular  
226 transition class in both the upper and lower off-diagonals (table S1). For further analysis, add the equivalent  
227 upper and lower off-diagonals together in order to obtain frequencies of each patch edge type (table S2); these  
228 numbers are equivalent to lengths of edges extracted directly from the image (Fig. 1C), and, like lengths, can be  
229 divided by their grand total to yield relative edge lengths. The result of either method is a  $C \times C$  lower off-  
230 diagonal transition or edge matrix,  $\mathbf{T}_E$  (table S2), where the lower off-diagonal numbers are the lengths or  
231 frequencies of the edge class defined by the intersection of the corresponding row and column. For example, if  
232 a particular cell (row  $i$  and column  $j$ ) has the value  $f_{ij}$ , then  $f_{ij}$  is the frequency of the transition between colours  $i$   
233 and  $j$  in both directions. Potential transitions between colours which are not observed because the appropriate  
234 patches do not come in contact will be represented by  $f_{ij} = 0$ . A given  $f_{ij}$  in  $\mathbf{T}_E$  estimates how commonly two  
235 colour/luminance classes share a common edge or the size of each patch type boundary.

## 236 237 238 239 2.2 MAGNITUDE HENCE SALIENCE OF PATCH BOUNDARIES

240  
241 The second and novel stage of analysis is an estimate of how conspicuousness the edge is likely to be to a  
242 given viewer under given environmental conditions. The receptor noise  $\Delta S$  estimate for any pair of colours is an  
243 estimate of edge conspicuousness or strength because colour and/or luminance differences are easier to detect  
244 for larger  $\Delta S$ . We can obtain photon captures for each patch using the irradiance spectrum illuminating the  
245 pattern in nature, the reflectance spectrum of the patch in the direction of the viewer, the transmission spectrum  
246 of the air or water between the pattern and viewer in nature, the transmission spectrum of the eye optics, and the  
247 absorption spectra of the visual pigments in each photoreceptor class (Lythgoe 1979; Endler & Mielke 2005;  
248 Kelber et al 2003). We obtain the  $\Delta S$  for all possible pairs of patches in the colour pattern (as did Siddiqi et al  
249 2004) based upon the photoreceptor captures, the relative abundance of each photoreceptor, and an assumption  
250 about the level of receptor noise (the Weber fraction, Kelber et al 2003). Methods for obtaining  $\Delta S$  are well



251 established, including in the R package *pavo* (Maia et al. 2013). The  $\Delta S$  for each kind of colour class  
252 comparison is then placed in the appropriate row and column in a second matrix with  $C$  rows and  $C$  columns  
253 (same format as table S2). It is only necessary to fill in the lower off-diagonal because the upper off diagonal  
254 should be identical, and the diagonals will be zero (no difference in a comparison of the same colour). This  
255 yields a  $C \times C$  transition or  $\Delta S$  matrix  $\mathbf{T}_S$  with data in the lower off-diagonal, where each entry  $s_{ij}$  is the  $\Delta S$  for  
256 patch colour/luminance classes indicated by row  $i$  and column  $j$ . Two different  $\mathbf{T}_S$  should be calculated by: (1)  
257 using all the photoreceptors used in colour vision (e.g. cones in vertebrates) to obtain chromatic  $\Delta S$  and (2)  
258 using the specific photoreceptor(s) used in luminance to get luminance or achromatic  $\Delta S$ . Consequently the  
259 result will be two  $\Delta S$  transition matrices,  $\mathbf{T}_{SC}$  from the chromatic  $\Delta S$  calculations and  $\mathbf{T}_{SL}$  from the luminance or  
260 achromatic  $\Delta S$  calculations. Ensure that the rows and columns of  $\mathbf{T}_{SC}$  and  $\mathbf{T}_{SL}$  correspond exactly in both length  
261 ( $C$ ) and row order to the rows and columns of  $\mathbf{T}_E$ .

262  
263 The matrix  $\mathbf{T}_E$  should contain the relative frequencies of each kind of transition and the matrices  $\mathbf{T}_{SC}$  and  
264  $\mathbf{T}_{SL}$  should contain the RN estimate of how differently ( $\Delta S$ ) the two adjacent colours in the corresponding  $\mathbf{T}_E$   
265 entry stimulate the retina with respect to chromaticity or luminance, respectively. They should have the same  
266 form as table S2. The lower off-diagonal values of these three matrices should be converted to vectors (one-  
267 dimensional lists) of length  $E = C(C-1)/2$ , and placed together in a  $E \times 3$  data matrix for convenience in further  
268 calculations (see table S3). This data matrix has the edge length, the chromatic  $\Delta S$ , and the luminance  $\Delta S$  for the  
269 transition (edge) class  $k$  in row  $k$ ; call these  $f_k$ ,  $sc_k$  and  $sl_k$  where  $k=1 \dots n$  patch classes. Table S3 shows an  
270 example where  $k=a,b\dots f$  and  $n=9$ .

271  
272 The data matrix provides a correspondence between edge lengths and their estimated visual magnitudes or  
273 salience. This, along with an annotated map of the patch boundaries (Fig. 1C), allows plotting the geometry of  
274 estimated patch boundary strengths for both chromatic and luminance  $\Delta S$ . In these diagrams the x and y axes  
275 are as in Fig. 1C and the z-axis is proportional to  $\Delta S$ . Fig. 1D,E show 3D plots of chromatic and luminance  
276 edge  $\Delta S$  for the guppy shown in Fig. 1A. We will call these diagrams “fort diagrams” because they resemble  
277 forts and “fort” means strong in French and Latin, so also refers to boundary strength. Note the very different  
278 geometric patterns of chromaticity and luminance boundaries in Fig. 1 D and E; the guppy shows high edge  
279 contrasts in different places for chromaticity and luminance. More specifically, luminance contrast is dominated  
280 by the black patch edges almost independent of the patch class they contact. Note the very high luminance  $\Delta S$   
281 (height) where a black patch contacts the very highly reflective silver patch towards the front of the guppy in  
282 (compare Fig. 1 A and E).

### 283 284 285 2.3 COMBINING PATCH PROPERTIES AND EDGES

286  
287 If edges contribute significantly to the conspicuousness of the entire colour pattern, then we may be able to  
288 capture at least part of what makes a colour pattern conspicuous by obtaining an aggregate measure of the edge  
289 magnitudes. We suggest the mean, standard deviation and CV of the edges'  $\Delta S$ , weighted by their corresponding  
290 lengths or frequencies. These are calculated from either the  $sc_k$  (chromatic  $\Delta S$ ) or  $sl_k$  (luminance  $\Delta S$ ) as  $s_k$  from



291  $\mathbf{T}_{SC}$  or  $\mathbf{T}_{SL}$ , and using the  $f_k$  (from  $\mathbf{T}_E$ ) as weights in the formulae:

292  
293  
294 weighted mean: 
$$m_{\Delta S} = \frac{\sum_{k=1}^E f_k s_k}{\sum_{k=1}^E f_k} \quad (1)$$

295  
296  
297 weighted standard deviation: 
$$s_{\Delta S} = \sqrt{\frac{n \sum_{k=1}^E f_k (s_k - m_{\Delta S})^2}{(n-1) \sum_{k=1}^E f_k}} \quad (2)$$

298  
299  
300  
301  
302 weighted coefficient of variation: 
$$CV = \frac{s_{\Delta S}}{m_{\Delta S}} \quad (3)$$

303  
304  
305 where E is the number of all possible different kinds of edges and n is the number of observed transitions or  
306 those with non-zero  $f_k$  (Filliben et al 1996);  $n \leq E$ . The supplemental appendix provides a MATLAB function to  
307 calculate the weighted mean and standard deviation; the equivalent functions in R are wt.mean and wt.sd within  
308 the R package *SDMTools* (Van der Wal et al 2014). Formulae 1 - 3 are the same formulae used to calculate the  
309 mean, SD and CV of chroma and luminance for overall within-contrast measurements, substituting chroma or  
310 luminance for  $s_k$  and mean chroma or luminance for  $m_{\Delta S}$ ; but circular statistics have to be used for hue angles  
311 (Endler & Mielke 2005).

312  
313 The weighted mean  $m_{\Delta S}$  is an estimate of the average conspicuousness of the whole pattern but weighting  
314 longer edges more than shorter ones. Similarly, the weighted standard deviation  $s_{\Delta S}$  measures how variable the  
315 edge magnitudes are over the entire pattern weighted by their lengths. The coefficient of variation CV is the  
316 standard deviation relative to the mean. If it is known that the viewer attends only to part of the pattern then  $m_{\Delta S}$   
317 and  $s_{\Delta S}$  should be calculated over the relevant part of the colour pattern. The assumption here is that a longer  
318 edge will stimulate more opponency units in the retina, and when the pattern is moving, a longer edge will  
319 sweep out more of the retinal area than a smaller edge. It is not known or obvious whether the mean, standard  
320 deviation, or even the CV would be a better predictor of salience. For example, a larger  $m_{\Delta S}$  might be more  
321 stimulating, but it is unknown whether this should be accompanied by a smaller  $s_{\Delta S}$  for consistently high  
322 stimulation over the entire pattern, or a larger  $s_{\Delta S}$  and hence less predictable edge magnitude to prevent sensory  
323 adaptation. Using CV instead of the standard deviation might be important if a given degree of variation is not  
324 more important for small versus larger means. These conjectures can only be answered by extensive  
325 behavioural studies with different  $m_{\Delta S}$  and  $s_{\Delta S}$ , measured under the appropriate conditions and appropriate parts  
326 of the body.

327  
328 Boundary Strength Analysis (BSA) can be applied to an animal colour pattern in order to estimate within-  
329 pattern visual contrast. They can also be applied to visual backgrounds to estimate within-background contrast,  
330 and if so estimates of signal-background contrast can be made by comparing parameters of animal and

331 background. For simplicity the results will concentrate on within-signal contrast.

### 334 3.0 EXAMPLES AND THEIR IMPLICATIONS

335  
336 To illustrate and explore the biological significance of BSA, we chose two species that are polymorphic in  
337 their patch colour, luminance and geometry, male guppies (*Poecilia reticulata*) and Gouldian finches (*Erythrura*  
338 *gouldiae*) because they have very different signal and signalling geometry. This allows us to showcase the  
339 power of the method in colour pattern research and the important effects of local patterns and viewing angle  
340 between the sender and receiver.

#### 342 3.1. GUPPY EXAMPLES AND IMPLICATIONS.

343 Male guppies are extremely polymorphic in patch geometry and properties (Endler 1978, 1980). Fig. 2  
344 shows Fort diagrams of six male guppies in the same format as Fig. 1C, D, ordered by decreasing chromatic  $m_{\Delta S}$   
345 and calculated in open/cloudy light conditions (Endler 1993b). The numbers are  $m_{\Delta S}$  and CV from equations (1)  
346 and (3). These six randomly selected guppies yield five observations: (1) Each guppy has edges with unique  
347 geometry. This goes with the considerable polymorphism of male guppy colour patterns (photos in Endler  
348 1978). (2) There is little geometric correspondence between the strength and positions of chromatic and  
349 achromatic (luminance) edges; the peaks in chromaticity do not correspond with peaks in luminance, and both  
350 depend upon which pair of patches form the edge. The spatial correlation between chromatic and luminance  $\Delta S$   
351 is always negative within a guppy although not always significantly so (Fig. 3A,B). (3) The negative correlation  
352 between the two  $\Delta S$  is not present when we consider all possible patch combinations (Fig. 3C); patch contacts  
353 and hence boundary strengths are clearly non-random. (4) Guppies differ in how variable their  $\Delta S$  heights are,  
354 indicating variation in which patches form common edges.

355  
356 Maximum chroma and luminance should be negatively correlated because the only way to increase chroma  
357 is to remove parts of a spectrum. Removing part of the spectral radiance reduces luminance. At the same time  
358 it increases the differences in stimulation among different photoreceptor classes, increasing chroma (Endler and  
359 Théry 1996; Endler and Mielke 2015). However,  $m_{\Delta S}$  and  $s_{\Delta S}$  depend upon geometry as well as patch properties  
360 and consequently predictions based upon patch properties alone may be invalid. For example, chromatic and  
361 luminance  $m_{\Delta S}$  might even be positively correlated if sexual selection jointly increases both luminance and  
362 chromatic  $m_{\Delta S}$ , which would make males more conspicuous. We tested for a possible chromatic-luminance  
363 relationship by analysing 200 male guppies. The two  $m_{\Delta S}$  are positively correlated (Fig. 3D). This is not what  
364 one would expect from random patch geometry, where every patch class has an equal probability of contacting  
365 the others (see also Fig. 3A,C). It suggests that particular colours are adjacent and adjacency has evolved to set  
366 particular levels of overall conspicuousness, as estimated by  $m_{\Delta S}$ . Random associations yield different  $m_{\Delta S}$ . The  
367 relationship for  $s_{\Delta S}$  is also positive (Fig. 3E), but the 200 points are widely scattered and appear in 3 clumps.  
368 This suggests partially discontinuous variation among fish boundary  $\Delta S$ , and could result from polymorphic  
369 colour pattern genes that control particular sets of spots (review in Endler 1978). The correlation and clumping  
370 for CV (Fig. 3F) is lower than for  $m_{\Delta S}$  and  $s_{\Delta S}$ . Patterns of variation in boundary strength could predict fitness in

371 any species because they affect pattern conspicuousness and hence colour pattern function and fitness.

372  
373 Fig. 4 shows chromatic and luminance  $m_{\Delta S}$  and  $s_{\Delta S}$  distributions for the 200 guppies analysed. The means  
374 are moderately symmetrically and unimodally distributed but the standard deviations are multimodal, as in Figs.  
375 3E, F. Note that  $m_{\Delta S} > 1.5$  indicates that, on average, the boundaries are detectable by females, but some may  
376 not be ( $m_{\Delta S} = 1$  is one JND, the threshold for distinguishing patches). Patches with similar colours or  
377 luminances which would lead to smaller  $\Delta S$  and  $m_{\Delta S}$  tend not to be adjacent. In general, we hypothesize that  
378 having adjacent patches with larger  $\Delta S$  would be advantageous in conspicuous signalling, but disadvantageous  
379 for crypsis. If most boundaries are not detectable and a few were, this might be a previously unrecognised form  
380 of disruptive colouration.

381  
382 The thick black line in Fig. 4 is the estimate for randomly arranged patch classes, as opposed to their  
383 observed geometry. This was calculated by letting every patch class contact every other patch class as in Fig.  
384 3C. For  $m_{\Delta S}$  it is larger than actually found in any fish, and for  $s_{\Delta S}$  it is larger than all fish except for chromatic  
385  $s_{\Delta S}$  where it is larger than 98% of the fish. This suggests that the observed colour patterns are less conspicuous  
386 than they would be if the patches were arranged at random. One would at first think that this is contrary to that  
387 expected because we assume that females should mate with males with larger  $m_{\Delta S}$  because they are more  
388 conspicuous than those with smaller  $m_{\Delta S}$ . However, visually hunting predators are always present in natural  
389 guppy populations, resulting in variation in the trade-off between sexual selection and predation (Endler 1978,  
390 1980). We speculate that guppies have been selected over millions of generations for optimal edge strengths  
391 balancing sexual selection and predation. We predict that samples taken from high predation populations would  
392 have distributions of  $m_{\Delta S}$  and  $s_{\Delta S}$  that extensively overlap  $\Delta S=1$ , indicating less conspicuous coloration  
393 representing the local balance between sexual selection and predation. This may apply to any species where  
394 there is a shifting balance between sexual selection and predation.

### 395 396 397 3.2. GOULDIAN FINCH EXAMPLES AND IMPLICATIONS

398 Gouldian finches provide examples of additional insights that can be gained from Boundary Strength  
399 Analysis. There are three polymorphs differing in head colour: black, yellow (golden) or red. Both males and  
400 females are coloured with females having less chromatic colours and a mauve rather than a purple chest. Unlike  
401 guppies, which have a relatively flat surface that is displayed towards females, Gouldian finches have a 3D  
402 colour pattern in which the relative proportion of patches and edges changes with viewing angle. Consequently  
403 we present Fort diagrams from Gouldian finches seen at two viewing angles: a  $\frac{3}{4}$  view and a side view (Fig. 5A,  
404 B). The analysis of the  $\frac{3}{4}$  view is shown in Figs. 5 and 6 and the side view in Fig. 7. More details are shown in  
405 the online appendix.

406  
407 Like guppies, there is a divergence between chromatic and luminance  $\Delta S$  (Fig 5C-H) and the spatial  
408 correlation between them is negative (except in the golden female morph). With fewer points than in the guppy  
409 data, none of the correlations are significant. Nevertheless, each correlation is smaller than the correlation  
410 between all possible pairs of colours for that morph and gender (see online appendix) suggesting that the

411 negative correlation has some function in both species.  
412

413 Given that the chromatic and achromatic patterns are different and almost complementary we suggest that  
414 the chromatic and achromatic components of colour patterns could be used for different functions, such as  
415 sexual selection, species recognition, or defense. Chromaticity and luminance are processed independently, and  
416 there is variation in their relative importance in stimulus choice and discrimination, among many species  
417 including crabs, psyllids, honeybees, bumblebees, flies, hawkmoths, birds and humans (Baldwin and Johnsen  
418 2012; Farnier et al 2014; Dyer et al 2008; Giurfa et al 1997; Kelber 2005, 2016; Kiel et al 2013; Osorio and  
419 Vorobyev 2005; White and Kemp 2016; White et al 2017; Zhou et al 2012). This suggests that chromatic and  
420 achromatic channels could have different functions in any taxa. There are also distance effects, probably due to  
421 the fact that in many animals, visual acuity is greater for achromatic than chromatic stimuli. For example, bees  
422 use chromatic cues when they subtend larger angles on their retina and achromatic cues when the visual angles  
423 are smaller (Giurfa et al 1997). This means that achromatic cues may be more useful at greater distances than  
424 chromatic cues, especially at lower light levels when acuity decreases, and colour vision stops working at still  
425 lower irradiances. Moreover, chromatic and luminance components are roughly independent in natural scenes  
426 (Hansen and Gegenfurtner 2009) suggesting that crypsis may be possible independently of signalling. The  
427 functional differences between chromatic and achromatic edges are worth further investigation.  
428

429 Gouldian finches also illustrate that: (1) The viewing angle significantly affects the perceived relative area  
430 of each patch, significantly affecting  $m_{AS}$  and  $s_{AS}$ ; the  $\frac{3}{4}$  view having higher  $m_{AS}$  and often higher  $s_{AS}$  than the  
431 side view (Table 1). This highlights the importance of recording the viewing angle during visual signalling. (2)  
432 Sexual dimorphism within each morph is associated with reduced edge intensities,  $m_{AS}$  and  $s_{AS}$ , in females of all  
433 morphs for both chromatic and achromatic  $AS$  (Fig. 6, Table 1), with less reduction in achromatic  $AS$  (Table 1).  
434 This illustrates the utility of BSA in estimating sexual dimorphism. (3) Within males or females, the three  
435 morphs differ in chromatic  $m_{AS}$  with the golden and red morphs similar but different from the black morph  
436 (Table 1). They differ less in achromatic  $m_{AS}$ , and there is surprisingly little variation in  $s_{AS}$  among morphs;  
437 perhaps this is the sign of a species-specific signal. (4) There is a clear difference in pattern between the head  
438 and the rest of the body, with the head values larger than the body. The difference in location-specific edge  
439 intensities is stronger in the side view. This reiterates the importance of calculations using the same view angle  
440 as used by the viewers, but it also shows a weakness of using  $m_{AS}$  and  $s_{AS}$  calculated over the entire body. It may  
441 be reasonable in guppies or other species that present the entire side of a relatively flat surface to the viewer, but  
442 it will be inaccurate if the viewer attends more to some parts of the body than the others. The stronger edges in  
443 the Gouldian finch heads may be associated with, and even selected by, conspecifics paying more attention to  
444 the heads than the rest of the body. The rest of the body may be used in species recognition and, or, reduction of  
445 predator risk. Consequently,  $m_{AS}$  and  $s_{AS}$  should be calculated on the parts of the colour pattern used in social  
446 interactions for signal design assessment whereas they should be calculated separately on the parts of the body  
447 seen by predators (using predator vision parameters). These two functions may be spatially separated. Clearly  
448 we need to know about the geometry of signalling as much as the geometry of the signals for accurate use of  
449 BSA.  
450

451  
452 4.0 GENERAL PREDICTIONS  
453

454 Because BSA can be used to analyse any animal or plant colour pattern, it is useful to make some general  
455 predictions, based upon the assumption that edges are important in colour pattern detection and perception  
456 (Gegenfurtner and Sharpe 1999; Dowling 2012; Stevens and Cuthill 2016), and that stronger edges (larger  $\Delta S$   
457 and greater length) are more effective.

458  
459 1. If  $m_{\Delta S}$  is important in intraspecific signalling then it should predict behaviours such as mate choice or any  
460 other visually-based choice behaviour. The relative importance of chromatic and luminance  $m_{\Delta S}$  is unknown,  
461 and this may vary among higher taxonomic groups. Consequently, we predict that the relationship between  $m_{\Delta S}$ ,  
462 pattern conspicuousness, decision-making, and fitness will be context, habitat and species specific. Restriction  
463 of  $m_{\Delta S}$  to calculations just over the part of the colour pattern tracked by viewers should be limited to species  
464 with well-studied signalling geometry, or will have to wait for more advances in eye-tracking methodologies  
465

466 2. If  $s_{\Delta S}$  is important in colour pattern conspicuousness then it should predict visually-based choices. However,  
467 it is not clear whether larger or smaller  $s_{\Delta S}$  increases the overall conspicuousness. Small  $s_{\Delta S}$  (or CV) could give  
468 a consistently higher stimulation to the retina. However, larger  $s_{\Delta S}$  might be more effective if spatially similar  
469  $\Delta S$  (low  $s_{\Delta S}$ ) leads to sensory adaptation and hence inefficient reception.

470  
471 3. For colour patterns, or components used in signalling, edges should have  $m_{\Delta S} > 1$  with respect to chromatic  
472 and luminance  $\Delta S$ ; edges with  $\Delta S \leq 1$  are unlikely to be detected. Patterns with small  $m_{\Delta S}$  have fewer detectable  
473 edges, leading to inefficient visual signalling. For crypsis, having mostly undetectable edges ( $m_{\Delta S} \leq 1$ ) is an  
474 advantage. However, if the background has many  $\Delta S > 1$  and the animal has many  $\Delta S \leq 1$  the animal's shape will  
475 be conspicuous. If both have many  $\Delta S > 1$  then the pattern may be cryptic (Endler 1978) or disruptively coloured  
476 (Endler 2006).

477  
478 4. For colour patterns or pattern parts used in signalling, the distribution of both  $m_{\Delta S}$  and  $s_{\Delta S}$  should be different  
479 from those of the visual background with respect to either chromatic or luminance  $\Delta S$  or both. The animal-  
480 background colour pattern component distributions should be similar for cryptic species, or parts of the colour  
481 patterns that are seen more often by predators than conspecifics.

482  
483 5. The animal-background match or mismatch of both  $m_{\Delta S}$  and  $s_{\Delta S}$  should differ in different parts of the animal's  
484 body for species that are usually seen by predators from one viewing angle (e.g. above or behind) and by  
485 conspecifics from another viewing angle (e.g. frontal; e.g. Salticid spiders); parts viewed by predators should be  
486 more cryptic than parts viewed by conspecifics. Colour pattern functions could not only differ in regions of the  
487 body viewed from different angles, but may also differ when viewed from different distances because this may  
488 cause some adjacent patches to blend (Endler 1978).

489  
490 6. For prey species living in areas over a range of predation intensities, the fraction of edges with  $\Delta S \leq 1$  should

491 be relatively higher in areas with higher predation because  $\Delta S \leq 1$  leads to poorer perception of separate patches,  
492 but the opposite is needed for disruptive colouration. The absolute fraction of edges with  $\Delta S \leq 1$  should depend  
493 upon the background patch pattern. For example, in visual backgrounds with highly contrasting patches (most  
494  $\Delta S \gg 1$ , large  $m_{\Delta S}$ ) the  $m_{\Delta S}$  and the distributions of  $\Delta S$  in the animal and backgrounds should be more similar in  
495 areas of higher predation intensity than areas of lower predation. For prey species that use only parts of the  
496 pattern for signalling, the signalling components should be smaller, with shorter edges and lower  $\Delta S$  in areas of  
497 greater predation risk.

498  
499 7. For species attending more to chromaticity than luminance in intraspecific signalling the chromatic  $m_{\Delta S}$  and  
500 most or all chromatic  $\Delta S$  should be larger than 1 with the opposite for luminance. This ensures that the pattern  
501 is maximally conspicuous to the receiver's visual system. A similar pattern should appear for luminance  $m_{\Delta S}$   
502 and  $\Delta S$  in species using luminance more than chromaticity.

## 503 504 505 5.0 GENERAL QUESTIONS 506

507 There is so little known about the implications of estimates of patch boundary strengths that predictions are  
508 limited, but there are several questions which are worth further investigation until we can make explicit  
509 predictions.

510  
511 1. Which is more important in intraspecific signalling,  $m_{\Delta S}$  or  $s_{\Delta S}$ ? If both are important, does their relative  
512 importance change with the complexity of the visual background or the mixture of different intraspecific and  
513 interspecific viewers?

514  
515 2.  $m_{\Delta S}$  and  $s_{\Delta S}$  estimate the effects of patch boundaries on the overall colour pattern conspicuousness. It is also  
516 possible that within-pattern variation in hue, chroma and luminance of patches also affect overall  
517 conspicuousness, regardless of whether or not they come into contact (Endler & Mielke 2005). What is the  
518 relative importance of overall variation in hue, chroma, luminance, and edge properties? Which measures  
519 successfully predict mate choice and survival under specific visual and ecological conditions?

520  
521 3. Do different aspects of salience allow for "private channels", allowing mitigation of the tradeoff between  
522 being conspicuous to potential mates and inconspicuous to predators? This might be most likely if, for example,  
523 predators used different visual processing, different components of the colour patterns, or different viewing  
524 distances than the prey use for intraspecific signalling.

525  
526 4. How do patch and patch edge properties communicate signal content? Do they constrain content enough to  
527 make predictions about the kind and amount of information to be transmitted to conspecifics?

528  
529 In sum, within the limitations outlined in sections 1.2 and 1.3, Boundary Strength Analysis will enable  
530 these questions to be addressed in any species that use vision to make decisions based upon reception and

531 perception of a sender's colour pattern.

532  
533  
534 ACKNOWLEDGEMENTS

535 We thank three reviewers for excellent and useful comments on the manuscript, Adrian Dyer for useful  
536 comments about the receptor noise model and Adelaide Sibeaux for comments on the manuscript and being  
537 willing to try it out as a way to predict guppy mating success (in progress). We thank the Australian Research  
538 Council for two discovery grants which supported this research (DP110101421 and DP150102817).

539  
540  
541 AUTHOR'S CONTRIBUTIONS

542 JAE devised the method, tested it, and wrote the first draft of the paper. GLC and XK prepared the guppy  
543 photographs, extracted the colour patch geometry from photographs, and helped revise the paper.

544  
545 DATA AVAILABILITY

546 A MATLAB script for calculating weighted means and standard deviations is found in the online supplemental  
547 material.

531  
532  
533  
534  
535  
536  
537  
538  
539  
540  
541  
542  
543  
544  
545  
546  
547  
548



549 **Table 1. Gouldian finch mean ( $m_{\Delta S}$ ) and SD ( $s_{\Delta S}$ ) of patch edge chromatic (Cr) and**  
550 **luminance (Lm)  $\Delta S$ , weighted by edge lengths**

551

| 552 | <b>Cr <math>m_{\Delta S}</math></b> | <b>Cr <math>s_{\Delta S}</math></b> | <b>Lm <math>m_{\Delta S}</math></b> | <b>Lm <math>s_{\Delta S}</math></b> | <b>Morph-gender-view</b>  |
|-----|-------------------------------------|-------------------------------------|-------------------------------------|-------------------------------------|---------------------------|
| 553 | 7.56                                | 4.97                                | 11.07                               | 10.43                               | Black, Male, 3/4 view     |
| 554 | 5.71                                | 4.25                                | 7.84                                | 9.29                                | Black, Male, Side view    |
| 555 | 4.49                                | 2.64                                | 8.55                                | 6.53                                | Black, Female, 3/4 view   |
| 556 | 3.19                                | 2.21                                | 5.78                                | 6.50                                | Black, Female, Side view  |
| 557 | 12.30                               | 5.46                                | 11.84                               | 11.08                               | Golden, Male, 3/4 view    |
| 558 | 8.58                                | 5.55                                | 9.75                                | 10.91                               | Golden, Male, Side view   |
| 559 | 6.70                                | 3.43                                | 9.90                                | 10.41                               | Golden, Female, 3/4 view  |
| 560 | 4.77                                | 3.57                                | 8.33                                | 9.91                                | Golden, Female, Side view |
| 561 | 11.44                               | 4.94                                | 12.95                               | 9.56                                | Red, Male, 3/4 view       |
| 562 | 7.96                                | 4.95                                | 9.68                                | 10.10                               | Red, Male, Side view      |
| 563 | 5.75                                | 2.98                                | 11.80                               | 9.30                                | Red, Female, 3/4 view     |
| 564 | 4.40                                | 3.25                                | 9.76                                | 9.24                                | Red, Female, Side view    |

565  
566 REFERENCES

- 567  
568 Arnold, S. J. (1983). Morphology, Performance and Fitness. *American Zoologist* 23, 347-361.  
569  
570 Arnold, S. J. (2003). Performance surfaces and adaptive landscapes. *Integrative and Comparative Biology* 43,  
571 367-375.  
572  
573 Baldwin, J. and S. Johnsen. 2012. The male blue crab, *Callinectes sapidus*, uses both chromatic and achromatic  
574 cues during mate choice. *J. Exper. Biol.* 215:1184-1191.  
575  
576 Dowling, J. E. (2012). *The Retina, an Approachable Part of the Brain*. Harvard/Belknap Press.  
577  
578 Dyer, A. G., J. Spaethe and S. Prack. 2008. Comparative psychophysics of bumblebee and honeybee colour  
579 discrimination and object detection. *J. Comp. Physiol. A.* 194:617-627. Doi: 10.1007/s00359-008-  
580 0335-1  
581  
582 Dyer, A. G., A. C. Paulk, and D. H. Reser. 2011. Colour processing in complex environments: insights from  
583 the visual system of bees. *Proc. Roy. Soc. B.* 278, 952-949. doi:10.1098/rspb.2010.2412  
584  
585 Elder, J. H., and A. J. Sachs. 2004. Psychophysical receptive fields of edge detection mechanisms. *Vision*  
586 *Research* 44, 795-813.  
587  
588 Endler, J. A. (1978). A predator's view of animal color patterns. *Evolutionary Biology* 11, 319-364.  
589  
590 Endler, J. A. (1980). Natural selection on color patterns in *Poecilia reticulata*. *Evolution* 34, 76-91.  
591  
592 Endler, J. A. (1993a). Some general comments on the evolution and design of animal communication systems.  
593 *Philosophical Transactions of the Royal Society, London B* 340, 215-225.  
594  
595 Endler, J. A. (1993b). The color of light in forests and its implications. *Ecological Monographs* 63, 1-27.  
596  
597 Endler, J.A. (2006). Disruptive and Cryptic Coloration. *Proc. Roy. Soc. B.* 273, 2425-2426. doi:  
598 10.1098/rspb.2006.3650  
599  
600 Endler, J. A. (2012). A framework for analysing colour pattern geometry: adjacent colours. *Biological Journal*  
601 *of the Linnean Society, London* 107, 233-253.  
602  
603 Endler, J. A., & Théry, M. (1996). Interacting effects of lek placement, display behavior, ambient light and  
604 color patterns in three neotropical forest-dwelling birds. *American Naturalist* 148, 421-452.

- 605  
606 Endler, J. A., & Mielke, P. W., Jr. (2005). Comparing entire colour patterns as birds see them. *Biological*  
607 *Journal of the Linnean Society*, London 86, 405-431.  
608  
609 Endler, J. A., Westcott, D. A., Madden, J. R., & Robson, T. (2005). Animal visual systems and the evolution of  
610 colour patterns; sensory processing illuminates signal evolution. *Evolution* 50, 1795-1818.  
611  
612 Farnier, K., A. G. Dyer and M. J. Steinbauer. 2014. Related but not alike: not all Hemiptera are attracted to  
613 yellow. *Frontiers in Ecology and Evolution* 2,67:1-12. Doi: 10.3389/fevo.2014.00067  
614  
615 Filliben, J. J., Heckert, A., & Lipman, R. R. (1996). NIST Dataplot software reference manual, pp 2-66 to 2-  
616 67. US national Institute of Standards and Technology.  
617 <http://www.itl.nist.gov/div898/software/dataplot/refman2/ch2/weightsd.pdf>  
618  
619 Fleishman, L. J., Perez, C. W, Yo, A. I., Cummings, K. J., Dick, S., & Almonte, E. (2016). Perceptual distance  
620 between colored stimuli in the lizard *Anolis sagrei*: comparing visual system models to empirical  
621 results. *Behavioural Ecology and Sociobiology* 70, 541-555.  
622  
623 Gegenfurtner, K. R. & Sharpe, L. T. (1999). *Color Vision, From Genes to Perception*. Cambridge University  
624 Press.  
625  
626 Giurfa, M., M. Vorobyev, R. Brandt, B. Posner, and R. Menzel. 1997. Discrimination of coloured stimuli by  
627 honeybees: alternative use of achromatic and chromatic signals. *J. Comp. Physiol.* 180:235-243.  
628  
629 Hansen, T., and K. R. Gegenfurtner. (2009). Independence of colour and luminance edges in natural scenes.  
630 *Visual Neuroscience* 26:35-49.  
631  
632 Keil, A., V. Miskovic, M. J. Gray, and J. Martinovic. 2013. Luminance, but not chromatic visual pathways,  
633 mediate amplification of conditioned danger signals in human visual cortex. *European Journal of*  
634 *Neuroscience*. 38:3356-3362.  
635  
636 Kelber, A. 2005. Alternative use of chromatic and achromatic cues in a hawkmoth. *Proc. Roy. Soc. B.*  
637 *272:2143-2147*.  
638  
639 Kelber, A. 2016. Colour in the eye of the beholder: receptor sensitivities and neural circuits underlying colour  
640 opponency and colour perception. *Current Opinion in Neurobiology* 41, 106-112. Doi:  
641 [10.1016/j.conb.2016.09.007](https://doi.org/10.1016/j.conb.2016.09.007)  
642  
643 Kelber, A., Vorobyev, M., & Osorio, D. (2003). Animal colour vision - behavioural tests and physiological  
644 concepts. *Biological Reviews* 78, 81-118.

- 645  
646 Lythgoe, J. N. (1979). *The Ecology of Vision*. Oxford University Press, Oxford.  
647  
648 Olsson, P., Lind, O., & Kelber, A. (2015). Bird colour vision: behavioural thresholds reveal receptor noise.  
649 *Journal of Experimental Biology* 218, 184-193. doi:10.1242/jeb.111187  
650  
651 Olsson, P., O. Lind, and A. Kelber. 2017. Chromatic and achromatic vision: parameter choice and limitations  
652 for reliable model predictions. *Behavioural Ecology* arx133, doi: 10.1093/beheco/arx133  
653  
654 Osorio, D., and M. Vorobyev. 2005. Photoreceptor spectral sensitivities in terrestrial animals; adaptation for  
655 luminance and colour vision. *Proc. Roy. Soc. B.* 272:1745-1752.  
656  
657 Sanes, J. R. and S. L. Zipursky. 2010. Design principles of insect and vertebrate visual systems. *Neuron* 66,  
658 15-36. doi:10.1016/j.neuron.2010.01.018  
659  
660 Siddiqi, A., Cronin, T. W., Loew, E. R., Vorobyev, M., & Summers, K. (2004). Interspecific and intraspecific  
661 views of color signals in the strawberry poison frog *Dendrobates pumilio*. *Journal of Experimental*  
662 *Biology* 207, 2471-2485.  
663  
664 Stevens, M. & Cuthill, I. C. (2016). Disruptive coloration, crypsis and edge detection in early visual  
665 processing. *Proc. Roy. Soc. B.* 273, 2141-2147. doi: 10.1098/rspb.2006.3556  
666  
667 Troscianko, J., Skelhorn, J., & Stevens, M. (2017). Quantifying camouflage: how to predict detectability from  
668 appearance. *BMC Evolutionary Biology* 17, 7. doi: 10.1186/s12862-016-0854-2  
669  
670 Troscianko, J., & Stevens, M. (2015). Image calibration and analysis toolbox – a free software suite for  
671 objectively measuring reflectance, colour and pattern. *Methods in Ecology and Evolution* 6, 1320-  
672 1331.  
673  
674 Troscianko, J., Wilson-Aggarwal, J, Stevens, M., & Spottiswoode, C. N. (2016). Camouflage predicts survival  
675 in ground-nesting birds. *Scientific Reports.* 6, 19966. doi 10.1038/srep19966  
676  
677 Van Belleghem, S. M., Papa, R., Ortiz-Zuazaga, H., Hendrickx, F., Jiggins, C. D., McMillan, W. O., &  
678 Counterman, B. A. (2018). Patternize: an R package for quantifying colour pattern variation.  
679 *Methods in Ecology and Evolution* 9,390-398. doi: 10.1111/2041-200X.12853  
680  
681 Vorobyev, M., & Osorio, D. (1998). Receptor noise as a determinant of colour thresholds. *Proceedings of the*  
682 *Royal Society, London B* 265, 351-358.  
683  
684 VanDerWal, J., Falconi, L., Januchowski, S., Shoo, L. & Storlie, C. (2014). *SDMTools: Species Distribution*

- 685 Modelling Tools: Tools for processing data associated with species distribution modelling exercises.  
686 R package version 1.1-221. <https://CRAN.R-project.org/package=SDMTools>  
687
- 688 White, T. E. and D. J. Kemp. 2016. Color polymorphic lures target different visual channels in prey. *Evolution*  
689 70:1398-1408. doi:10.1111/evo.12948  
690
- 691 White, T. E. and D. J. Kemp. 2017. Color polymorphic lures exploit innate preferences for spectral versus  
692 luminance cues in dipteran prey. *BMC Evolutionary Biology* 17:191,1-10. doi: 10.1186/s12862-017-  
693 1043-7  
694
- 695 White, T. E., B. Rojas, J. Mappes, P. Rautiala, and D. J. Kemp. 2017. Colour and luminance contrasts predict  
696 the human detection of natural stimuli in complex visual environments. *Biology Letters*. 13:  
697 20170375. doi: 10.1098/rsbl.2017.0375  
698
- 699 Zhou, Y., X. Ji, H. Gong, Z. Gong, and L. Liu. 2012. Edge detection depends upon achromatic channel in  
700 *Drosophila melanogaster*. *J. Exper. Biol.* 215:3478-3487.  
701

702 **Figure Captions:**

703  
704 FIGURE 1. Example analysis of a male guppy colour pattern. (A), photograph of a guppy (scale not shown).  
705 (B), part of the resulting zone map indicated by the circle in panels (A) and (C). Each pixel has a code  
706 indicating which colour/luminance class overlaps that pixel (see Endler 2012 for details). (C) edge map; this  
707 can either be derived directly from the photograph (A) or from the zone map (B). (D), Diagram in which the x,y  
708 (horizontal) coordinates correspond to the edge map in (C) and the vertical axis corresponds to the chromatic  $\Delta S$   
709 between adjacent patches under specific ambient light conditions. (E) as in (D) but for luminance  $\Delta S$ . Note the  
710 lack of topographic correspondence between the chromatic and luminance diagrams. For brevity we will refer  
711 to (D) and (E) as "Fort Diagrams" because they resemble old fashioned fortresses).

712  
713 FIGURE 2. Examples of Fort Diagrams for 6 different guppy colour patterns, arranged in order of decreasing  
714 chromatic  $m_{\Delta S}$ . Rows correspond to the same individual guppy and columns refer to the guppy's chromatic or  
715 luminance Fort diagram, respectively. Numbers under the diagrams for each row are chromatic  $m_{\Delta S}$  and CV  
716 (left column) and luminance  $m_{\Delta S}$  and CV (right column) for the same guppy. Note the lack of topographic  
717 correspondence between the chromatic and luminance diagrams, and the variation among individuals.

718  
719 FIGURE 3. Relationships between chromatic and luminance in guppies. A, Significant negative correlation  
720 between chromatic and luminance  $\Delta S$  within a guppy having an average correlation value. B, Distribution of the  
721 correlations among 11 guppies; all are negative but two are not significantly negative. C, Lack of correlation  
722 between all possible chromatic and luminance edges; note the larger range and higher joint values compared to A.  
723 D, The relationship between chromatic and luminance  $m_{\Delta S}$  of 200 guppies. E, Relationship for  $s_{\Delta S}$ . F,  
724 relationship for  $CV_{\Delta S}$

725  
726 FIGURE 4. The distributions of chromatic and luminance edge statistics  $m_{\Delta S}$  and  $s_{\Delta S}$  of the 200 guppies in Figs.  
727 3 and 4. (A), chromatic  $m_{\Delta S}$ , (B), chromatic  $s_{\Delta S}$ , (C), luminance  $m_{\Delta S}$ , (D) luminance  $s_{\Delta S}$ . All guppies have  $m_{\Delta S}$   
728  $>1$  indicating that adjacent patches are always discriminable to guppies under the environmental conditions.  
729 The thick vertical lines show the same statistics if the colour patches were distributed at random over each  
730 guppy's body; every patch class had an equal probability of contacting the others. Almost all guppies show  
731 smaller values than expected from random patch locations.

732  
733 FIGURE 5. Gouldian finches. A, edge map traced from a 3/4 view photograph. B, edge map traced from a  
734 side view photograph. C-H, fort diagrams of the three male morphs (rows) showing the difference in pattern for  
735 chromatic and luminance  $\Delta S$  (columns) in the 3/4 view.

736  
737 FIGURE 6. Fort diagrams showing sexual dimorphism in the black and golden-headed morphs with respect to  
738 both chromatic and luminance  $\Delta S$  in the 3/4 view. The red-headed morph does not differ very much from the  
739 golden-headed morph (see online appendix for all fort diagrams).

740  
741 FIGURE 7. Fort diagrams of side views of the black and golden-headed morphs. See online appendix for all

742 fort diagrams.

743



**A. Guppy photograph**

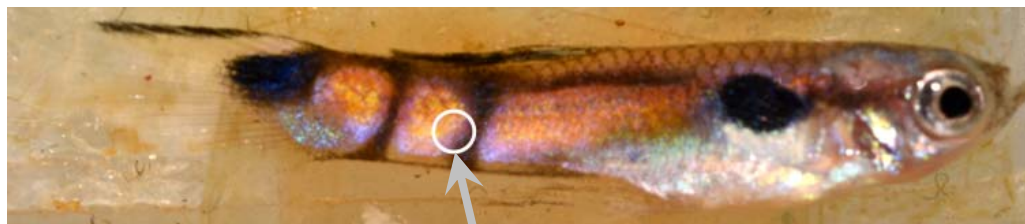

**B. Part of zone map;  
one color/luminance  
code per pixel**

|    |    |    |    |    |   |   |
|----|----|----|----|----|---|---|
| 15 | 15 | 15 | 15 | 15 | 1 | 1 |
| 15 | 15 | 15 | 15 | 15 | 1 | 1 |
| 15 | 15 | 15 | 15 | 15 | 1 | 1 |
| 15 | 15 | 15 | 1  | 1  | 1 | 1 |
| 15 | 15 | 15 | 1  | 1  | 1 | 1 |
| 15 | 12 | 12 | 1  | 1  | 1 | 1 |
| 15 | 12 | 12 | 1  | 1  | 1 | 1 |
| 12 | 12 | 12 | 1  | 1  | 1 | 1 |
| 12 | 12 | 12 | 1  | 1  | 1 | 1 |

**C. Map of patch  
edges**

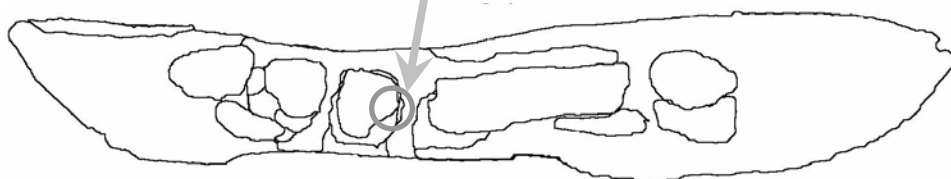

**D. Chromatic  $\Delta S$   
at each edge**

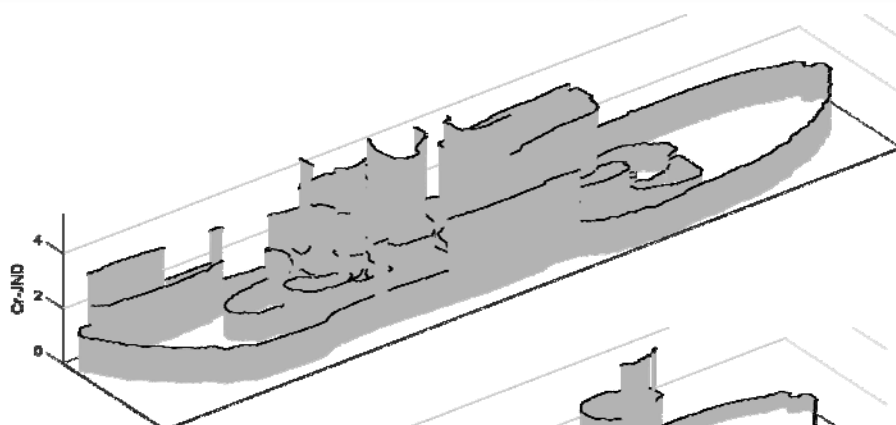

**E. Luminance  $\Delta S$   
at each edge**

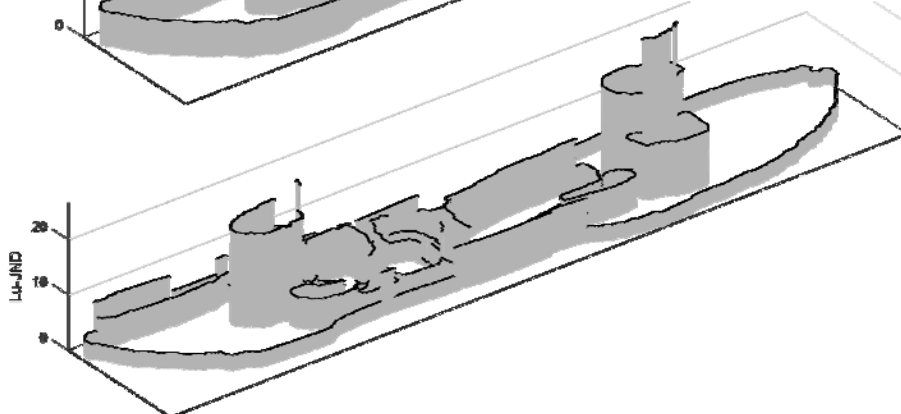

## Chromatic $m_{\Delta S}$ and CV

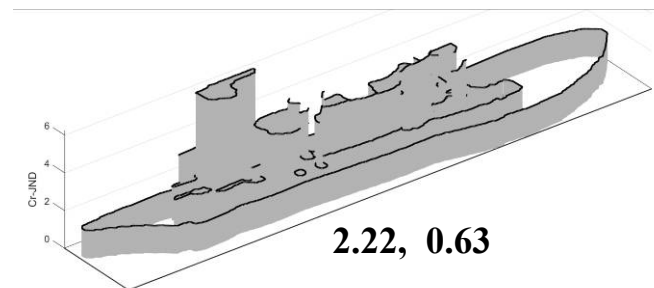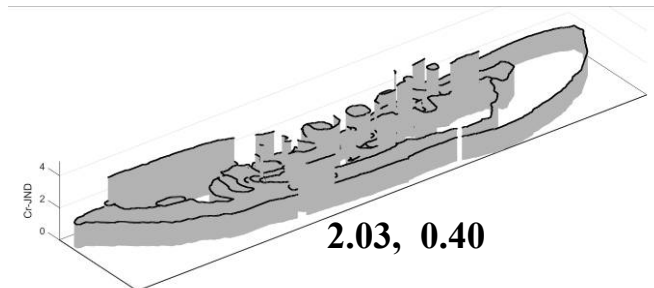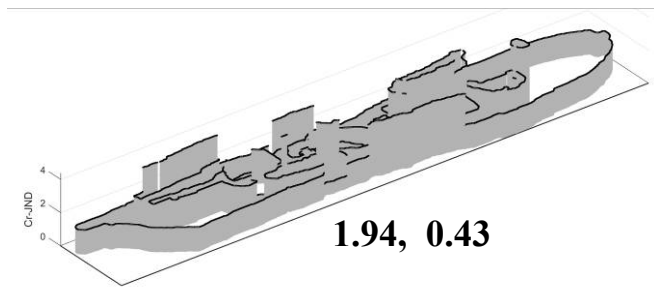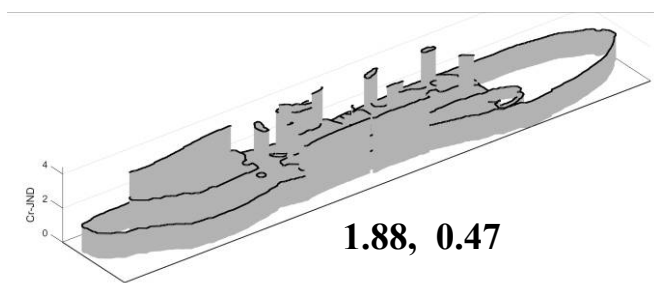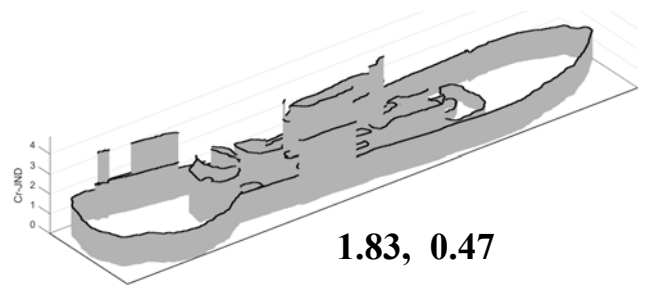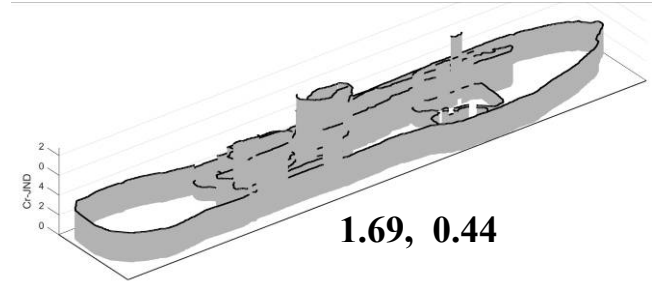

## Luminance $m_{\Delta S}$ and CV

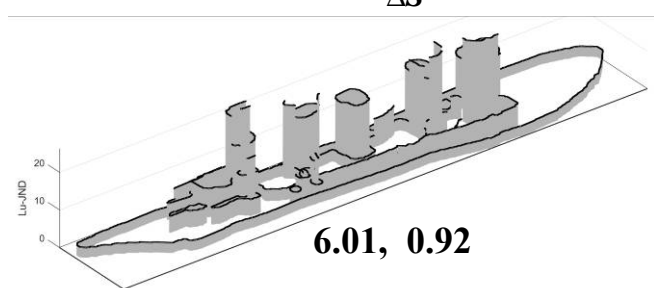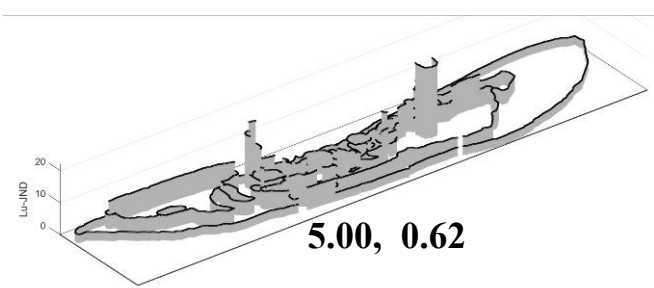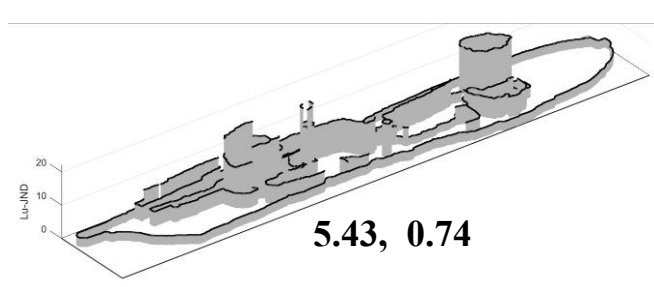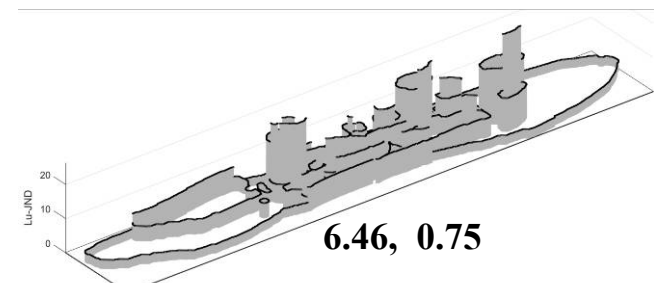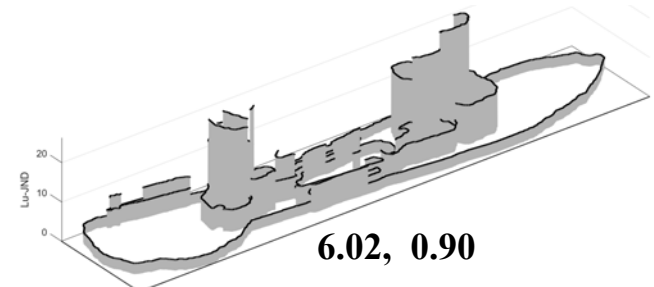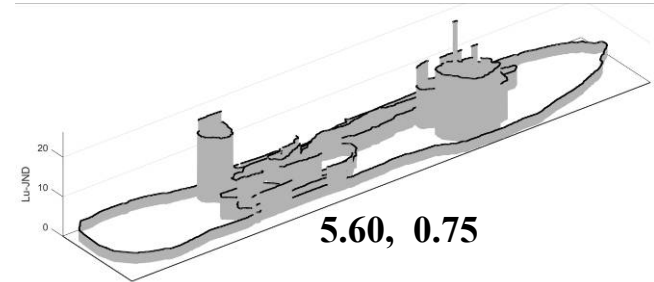

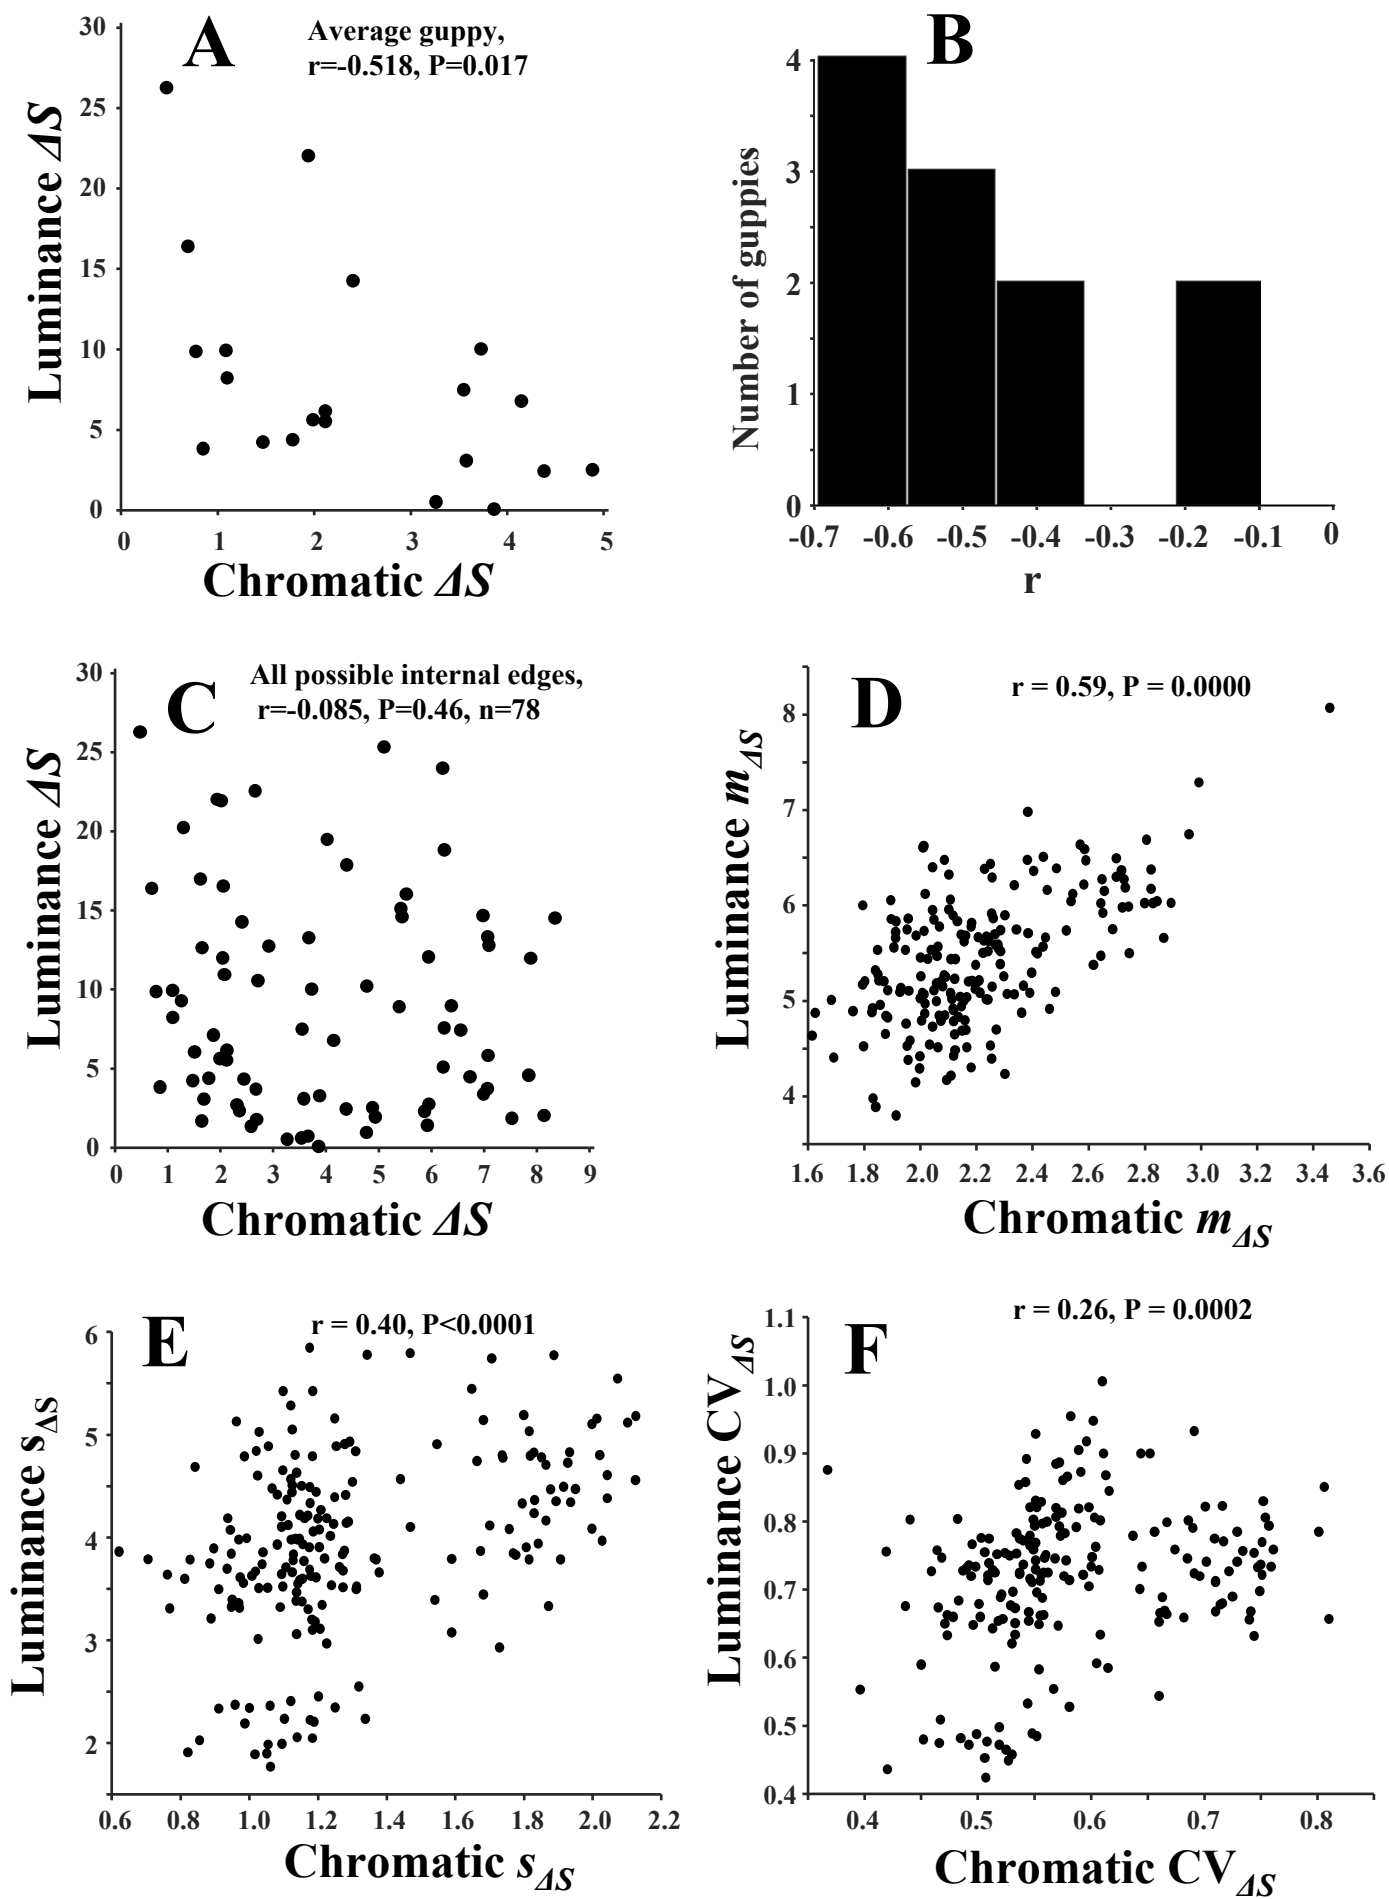

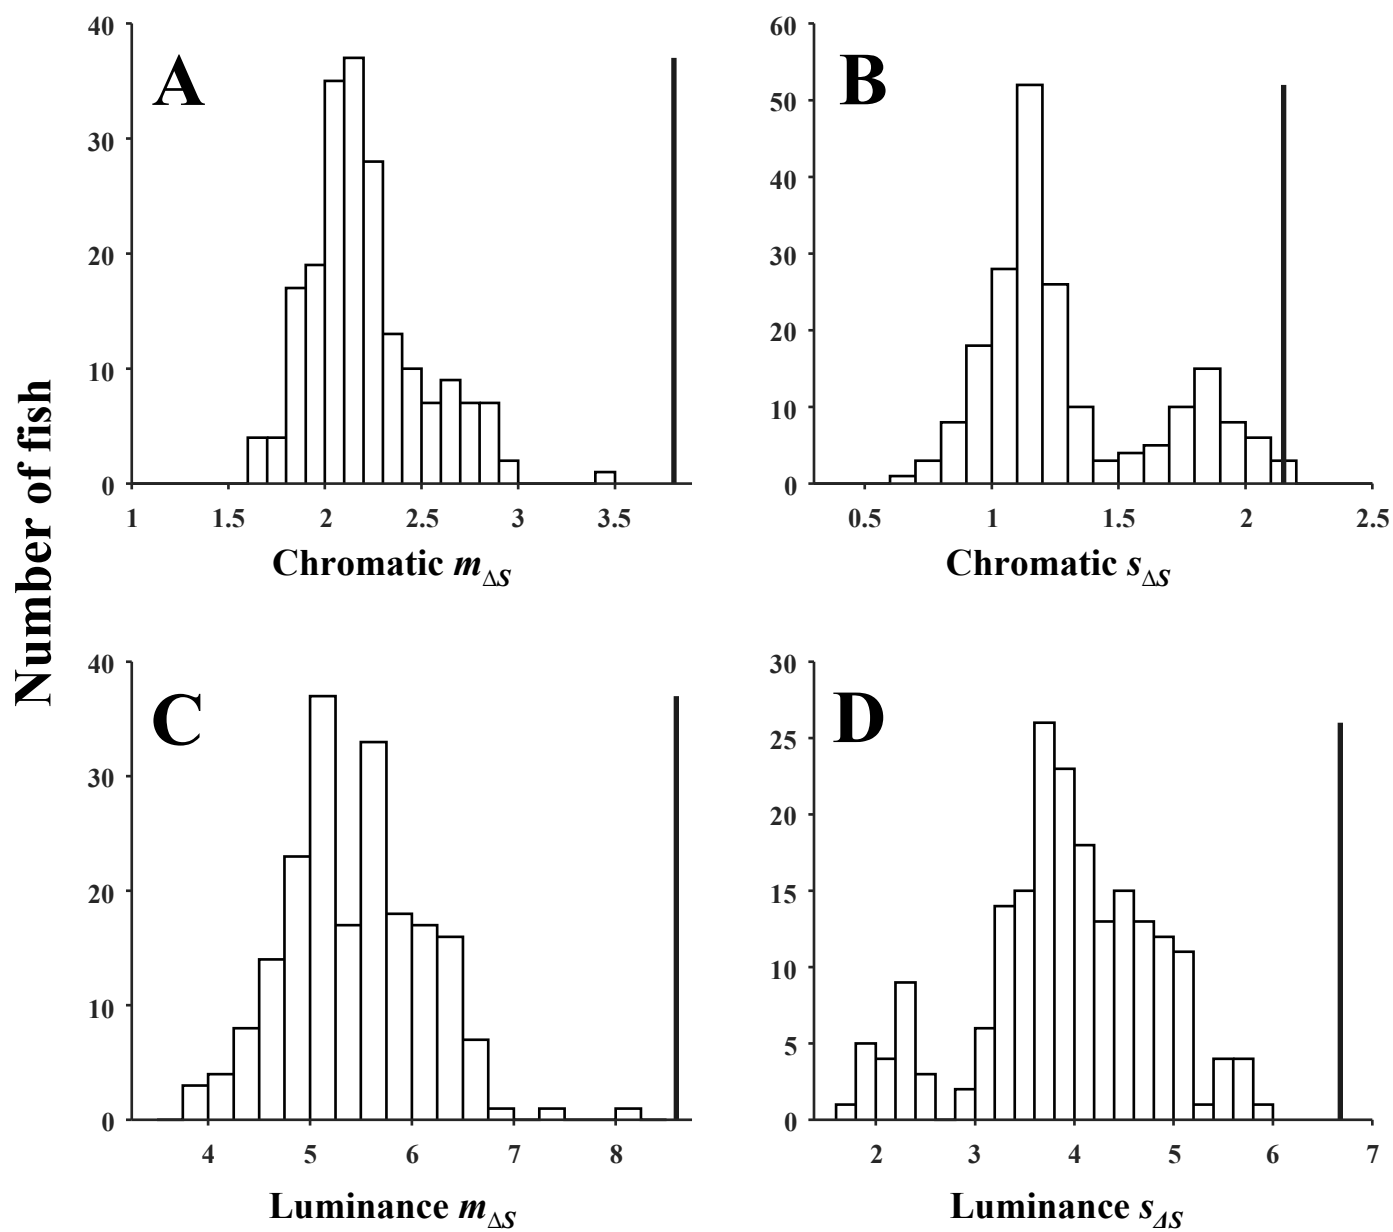

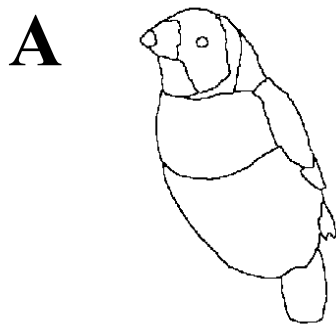

Male, Black, 3/4 view, Chromatic  $\Delta S$

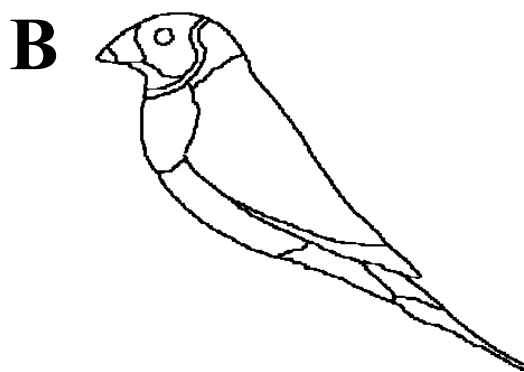

Male, Black, 3/4 view, Luminance  $\Delta S$

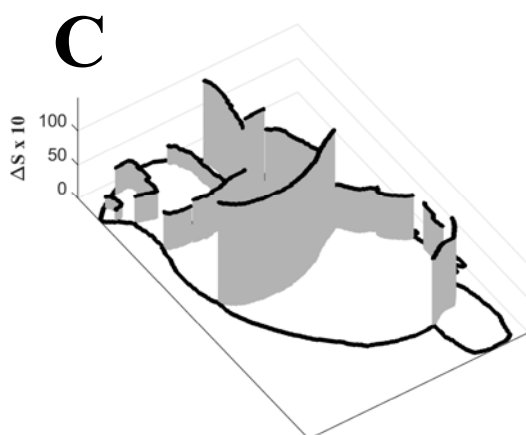

Male, Golden, 3/4 view, Chromatic  $\Delta S$

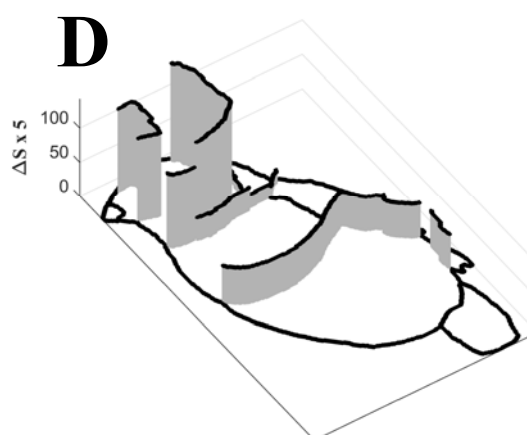

Male, Golden, 3/4 view, Luminance  $\Delta S$

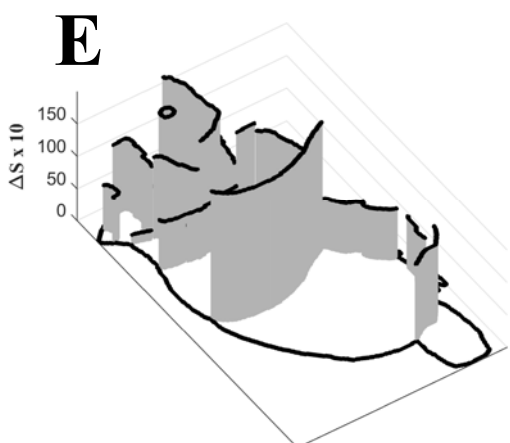

Male, Red, 3/4 view, Chromatic  $\Delta S$

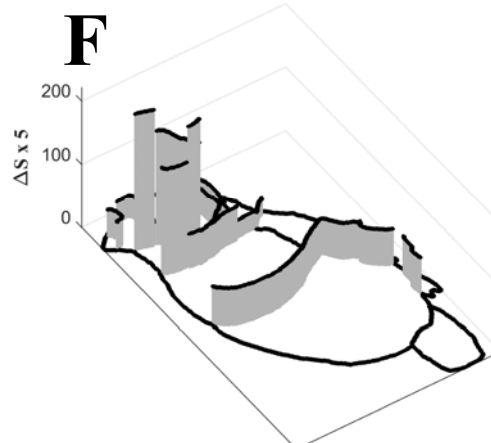

Male, Red, 3/4 view, Luminance  $\Delta S$

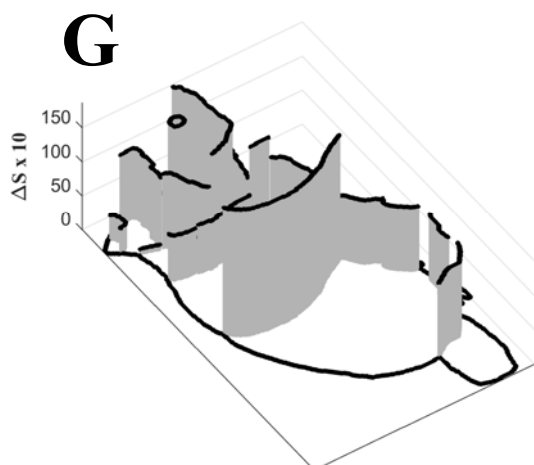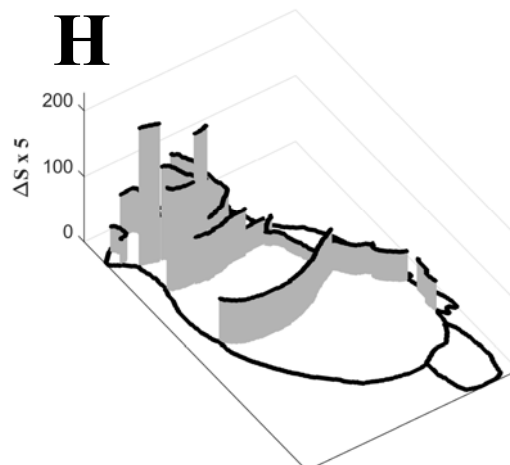

Male, Black, 3/4 view, Chromatic  $\Delta S$

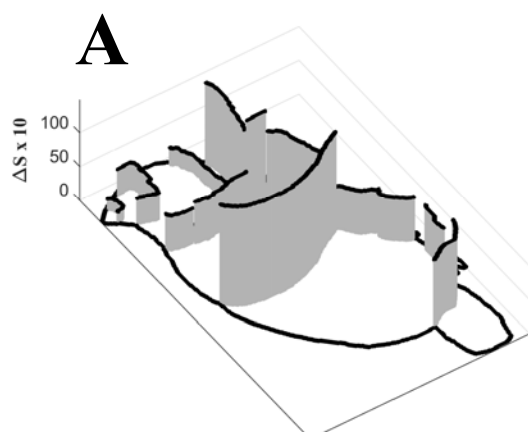

Female, Black, 3/4 view, Chromatic  $\Delta S$

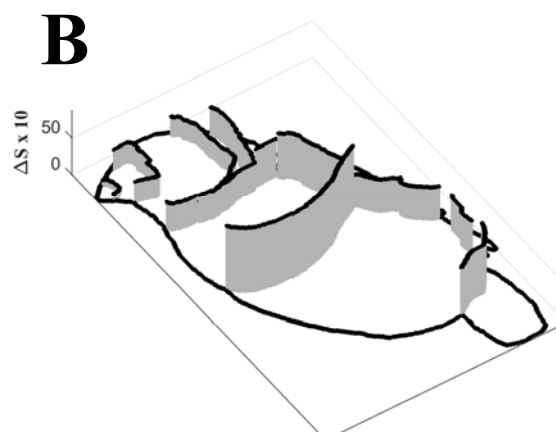

Male, Golden, 3/4 view, Chromatic  $\Delta S$

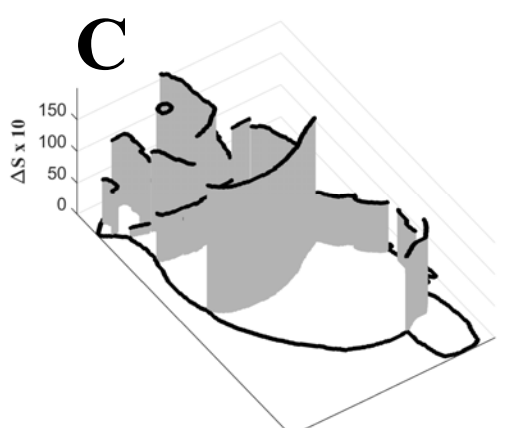

Female, Golden, 3/4 view, Chromatic  $\Delta S$

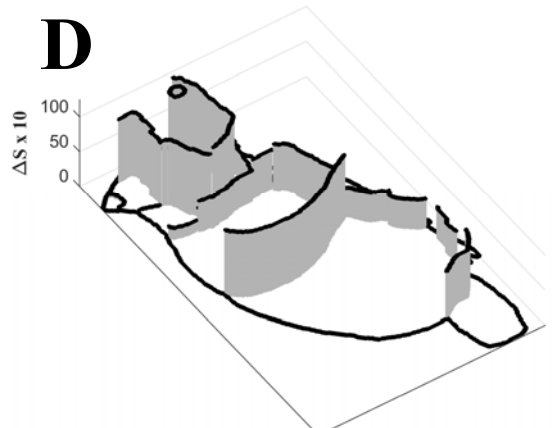

Male, Black, 3/4 view, Luminance  $\Delta S$

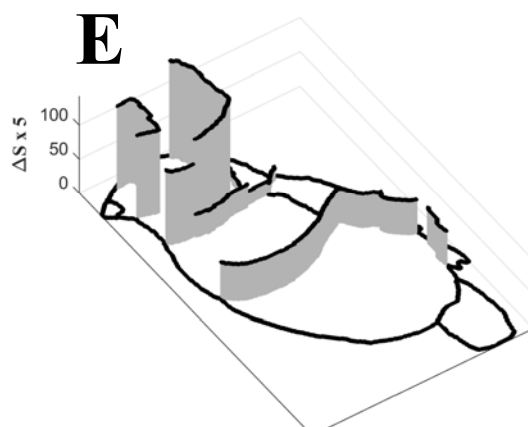

Female, Black, 3/4 view, Luminance  $\Delta S$

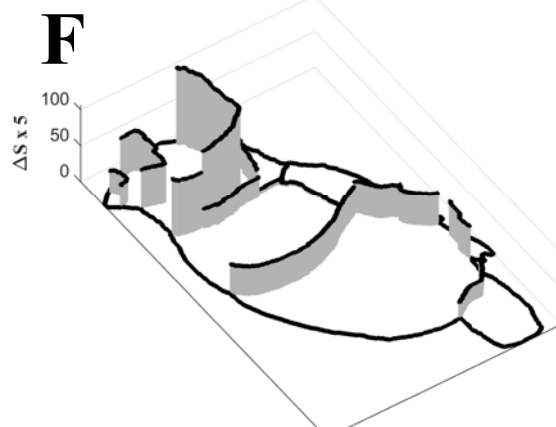

Male, Golden, 3/4 view, Luminance  $\Delta S$

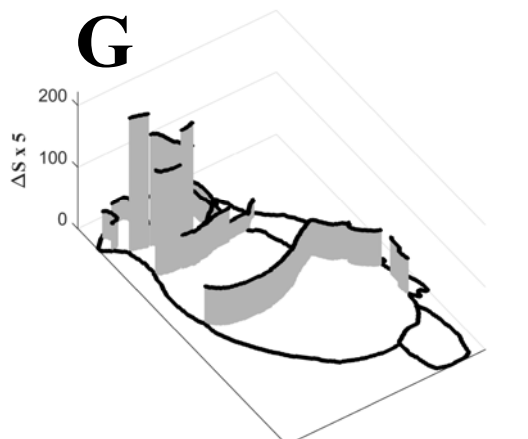

Female, Golden, 3/4 view, Luminance  $\Delta S$

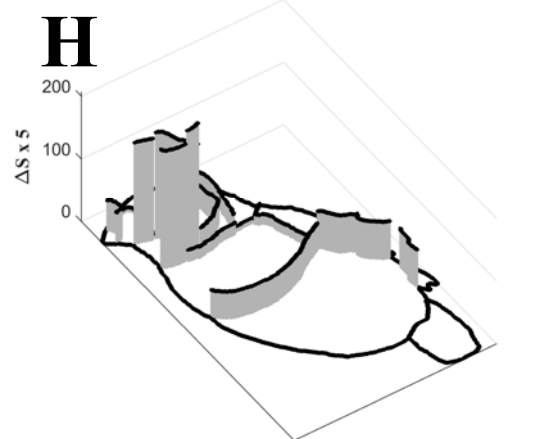



Male, Black, Side view, Chromatic  $\Delta S$

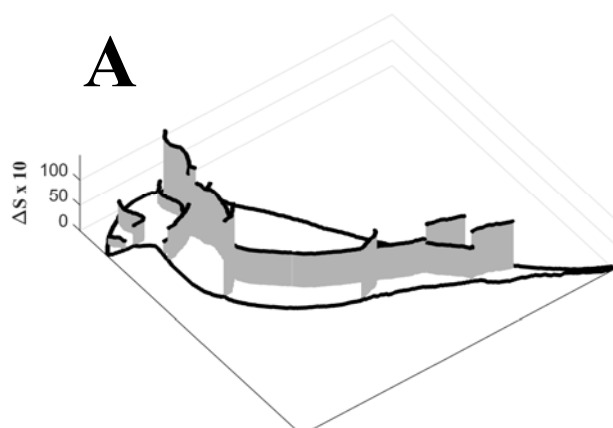

Female, Black, Side view, Chromatic  $\Delta S$

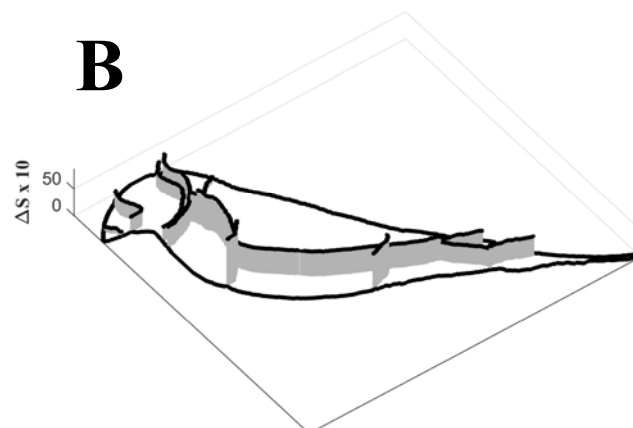

Male, Golden, Side view, Chromatic  $\Delta S$

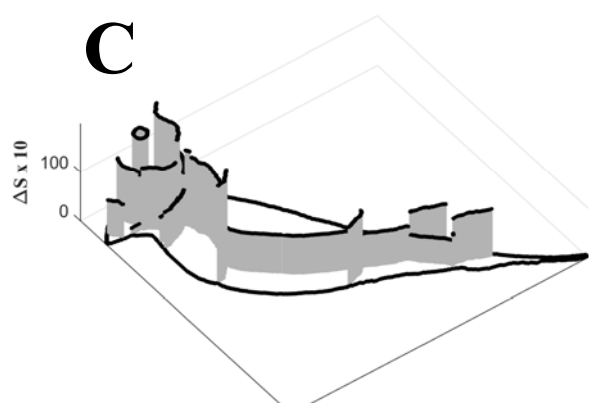

Female, Golden, Side view, Chromatic  $\Delta S$

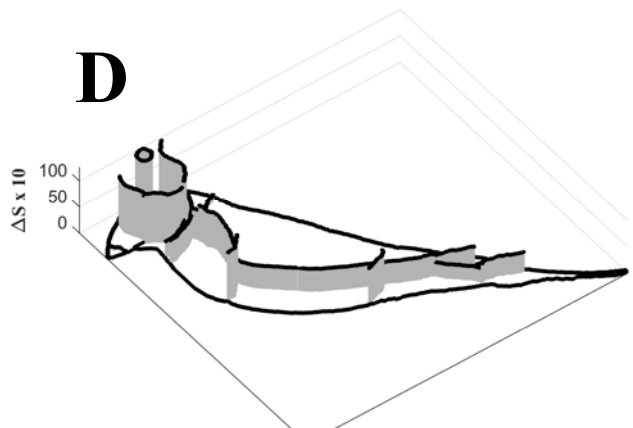

Male, Black, Side view, Luminance  $\Delta S$

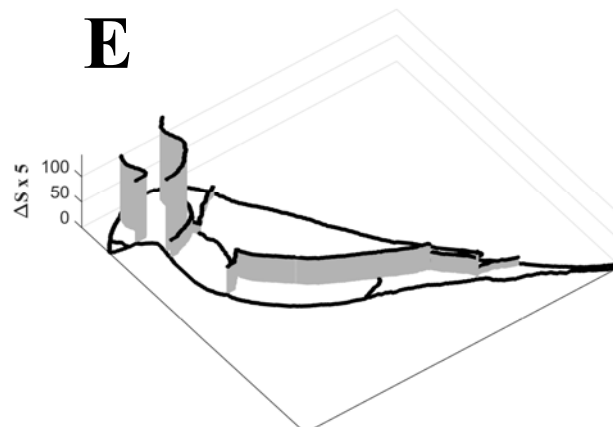

Female, Black, Side view, Luminance  $\Delta S$

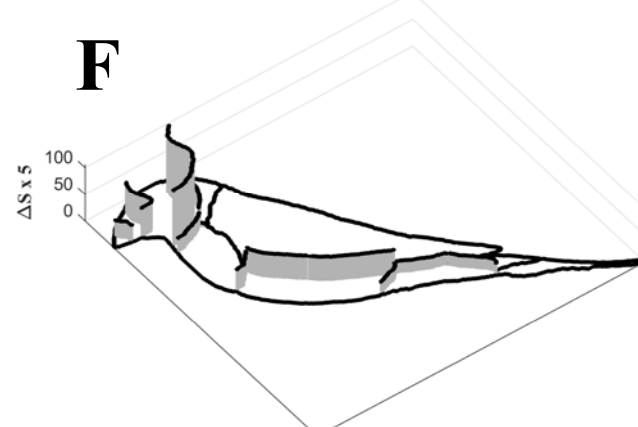

Male, Golden, Side view, Luminance  $\Delta S$

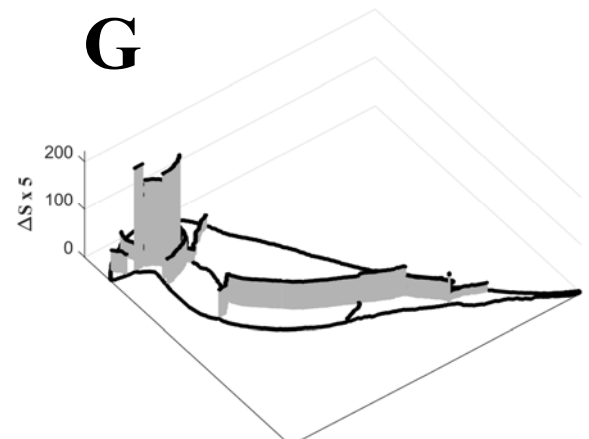

Female, Golden, Side view, Luminance  $\Delta S$

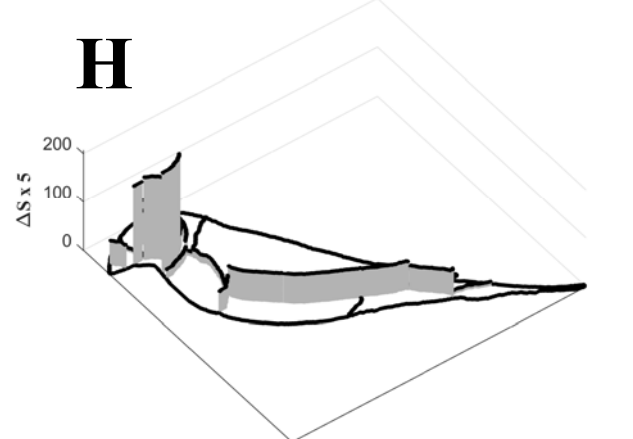



Combining colour pattern geometry and colored patch visual properties in order to predict behaviour and fitness

John A. Endler, Gemma Cole and Xandy Kranz

## Supplemental information

### 1. Example of transition matrix terminology and calculations.

#### 1.1. The Edge Matrix, $\mathbf{T}_E$

Consider a color pattern in which there are  $C = 4$  colors,  $c_i$ , where  $i = 1, 2, 3, 4$ . The edge matrix  $\mathbf{T}_E$  can be generated either from a zone map (Endler 2012) or directly from a map of the edges.

If  $\mathbf{T}_E$  was generated from a zone map, the raw  $\mathbf{T}_E$  data will appear as in Table S1.

Table S1, example of a raw edge length or frequency matrix  $\mathbf{T}_E$  and  $C = 4$

|       | $c_1$    | $c_2$    | $c_3$    | $c_4$    |
|-------|----------|----------|----------|----------|
| $c_1$ | $f_{11}$ | $f_{12}$ | $f_{13}$ | $f_{14}$ |
| $c_2$ | $f_{21}$ | $f_{22}$ | $f_{23}$ | $f_{24}$ |
| $c_3$ | $f_{31}$ | $f_{32}$ | $f_{33}$ | $f_{32}$ |
| $c_4$ | $f_{41}$ | $f_{42}$ | $f_{43}$ | $f_{44}$ |

In the raw  $\mathbf{T}_E$ , each  $f_{ij}$  is the number of adjacent pixel pairs with the same ( $i = j$ ) or different ( $i \neq j$ ) colors. If  $i = j$  then the transition was within a given color class. If  $i \neq j$  then the transition was across the edge between two color classes. If each  $f_{ij}$  is divided by the sum of all of  $f$ , then  $f_{ij}$  is the relative frequency of transition  $i-j$ . The diagonals ( $f_{ii}$ ) estimate the total area of each color, and the off-diagonals ( $i \neq j$ ) estimate the relative frequency or total length of the edges between colors  $c_i$  and  $c_j$ . The upper and lower off-diagonals are just records of transitions in different directions,  $i \rightarrow j$  and  $j \rightarrow i$ . For subsequent analysis, the upper and lower off-diagonals should be combined as  $f_k = f_{ij} + f_{ji}$ , where  $k = 1 \dots E$ , and  $E = C(C-1)/2$ . In this example  $E = 6$ . For subsequent analysis use the  $f_k$  and ignore the diagonals, yielding the final version of  $\mathbf{T}_E$ , as in Table S2.

Table S2, example of a the final version of the edge transition matrix  $\mathbf{T}_E$

|      | $c1$                    | $c2$                    | $c3$                    | $c4$ |
|------|-------------------------|-------------------------|-------------------------|------|
| $c1$ |                         |                         |                         |      |
| $c2$ | $f_a = f_{12} + f_{21}$ |                         |                         |      |
| $c3$ | $f_b = f_{13} + f_{31}$ | $f_c = f_{23} + f_{32}$ |                         |      |
| $c4$ | $f_d = f_{14} + f_{41}$ | $f_e = f_{24} + f_{42}$ | $f_f = f_{34} + f_{43}$ |      |

In table S2  $f_k$  where  $k = a, b, \dots, f$  instead of 1, 2, .. 6 to avoid confusion with  $i$  and  $j$ .

If  $\mathbf{T}_E$  was generated directly from a map of the edges, then the data will appear as in table S2 with only cells  $f_k$ .

For either  $\mathbf{T}_E$  calculation, the  $f_k$  can be converted to frequencies by dividing by their total,  $T = \sum f_k$ .

For  $\mathbf{T}_E$  generated either from transitions or directly from an edge map, there are potentially  $E = C(C-1)/2$  edge frequencies or lengths  $f_k$ . However, the larger the  $C$ , the more likely it is that some colors may not contact others, and, as a consequence, some of the  $f_k$  will be zero.

## 1.2. The $\Delta S$ Matrices, $\mathbf{T}_{SC}$ and $\mathbf{T}_{SL}$

These are accumulated directly from calculating the Receptor Noise JND or signal/noise ratio  $\Delta S$  for all possible combinations of the  $C$  colors. The matrix will resemble Table S, with  $s_{ij}=\Delta S$  for colors  $i$  and  $j$  instead of  $f_{ij}$ , but the diagonals will be zero and the upper and lower off-diagonals will be identical for a given  $i$  and  $j$ . In this case just take the lower off-diagonals (call them  $s_k$ ), giving a matrix in the same form as Table S2.

## 1.3. Analysing $\mathbf{T}_E$ , $\mathbf{T}_{SC}$ and $\mathbf{T}_{SL}$

For all three transition matrices,  $\mathbf{T}_E$ ,  $\mathbf{T}_{SC}$  and  $\mathbf{T}_{SL}$ , rearrange their  $f_k$  and  $s_k$  into column vectors. This can be done easily with the reshape function in MATLAB or the as.vector function in R. For further analysis it is convenient to place the three vectors into a  $E \times 3$  data matrix with one row per transition class, as in table S3. See main text for how the data matrix is used.

Table S3, transition matrices from Table S2 converted into vectors

| $\mathbf{T}_E$ | $\mathbf{T}_{SC}$ | $\mathbf{T}_{SL}$ |
|----------------|-------------------|-------------------|
| $f_a$          | $s_a$             | $s_a$             |
| $f_b$          | $s_b$             | $s_b$             |
| $f_c$          | $s_c$             | $s_c$             |
| $f_d$          | $s_d$             | $s_d$             |
| $f_e$          | $s_e$             | $s_e$             |
| $f_f$          | $s_f$             | $s_f$             |

## 2. MATLAB function to calculate weighted mean and weighted standard deviation

```
function [mn,sd]=WeightedMnSD(x,w)
% [mn,sd]=WeightedMnSD(x,w);
% Calculates the mean and SD for x data with weights w
% INPUT: x values
%         w weights for each value
% Both x and w must be the same length
% Will automatically remove any rows with NaN in x
% Formulae from the DATAPLOT manual pages 2-66 to 2-67 at
% http://www.itl.nist.gov/div898/software/dataplot/refman2/ch2/weightsd.pdf
t=isnan(x);
if sum(t)>0 %remove NaN rows
    xx=x(t==0); ww=w(t==0);
    x=xx; w=ww; w=w/sum(w);
end;
n=length(x); n2=length(w);
if n~=n2
    mn=NaN; sd=NaN;
    fprintf(1,'X and weights do not have same n\n');
    return;
end;
sw=sum(w); %sum of weights
swx=sum(x.*w); %sum of weights times x
mn=swx/sw; %weighted mean
nnz=sum(w(w>0)>0); %number of nonzero weights
if nnz>1
    s=0;
    for i=1:n
        s=s+w(i)*(x(i)-mn)^2;
    end;
    sd=sqrt(nnz*s/((nnz-1)*sw)); %math.stackexchange.com
else
    sd=0;
end;
```

### 3. Gouldian Finch example in more detail

The analysis was done for two views of each morph, digitized from photographs. The two views may represent two different views as seen by conspecifics but in any case demonstrate the effects of different views of the same bird. The illustrations below are maps of the patch boundaries.

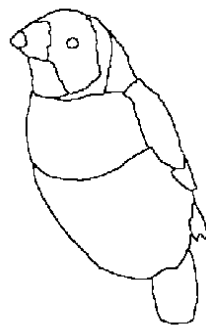

3/4 view

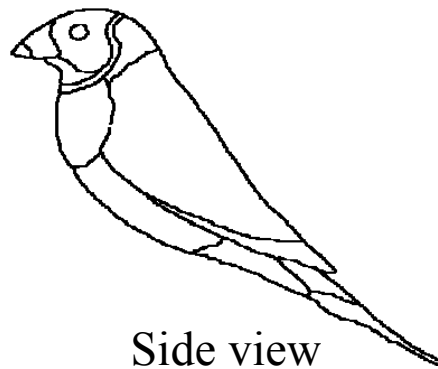

Side view

The following 4 pages show various combinations of morph (Black, Golden and Red), sex, and view.

Note that, for clarity, the boundary height (intensity) between the bird and the background is shown as zero. When seen against real background there would be fluctuations around the bird's perimeter both above and below the bird's own patch boundary intensity.

**Male, Black, 3/4 view, Chromatic  $\Delta S$**

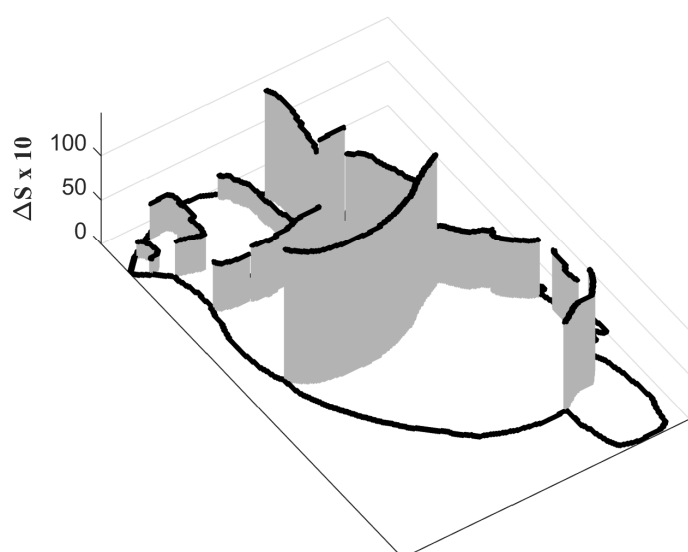

**Female, Black, 3/4 view, Chromatic  $\Delta S$**

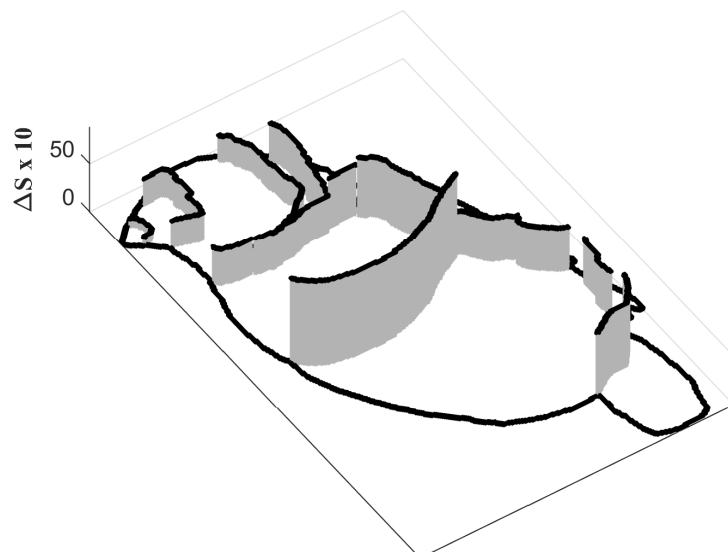

**Male, Golden, 3/4 view, Chromatic  $\Delta S$**

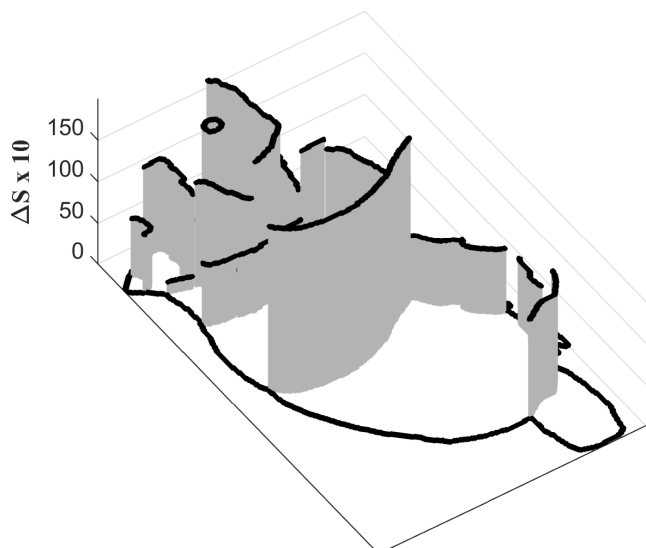

**Female, Golden, 3/4 view, Chromatic  $\Delta S$**

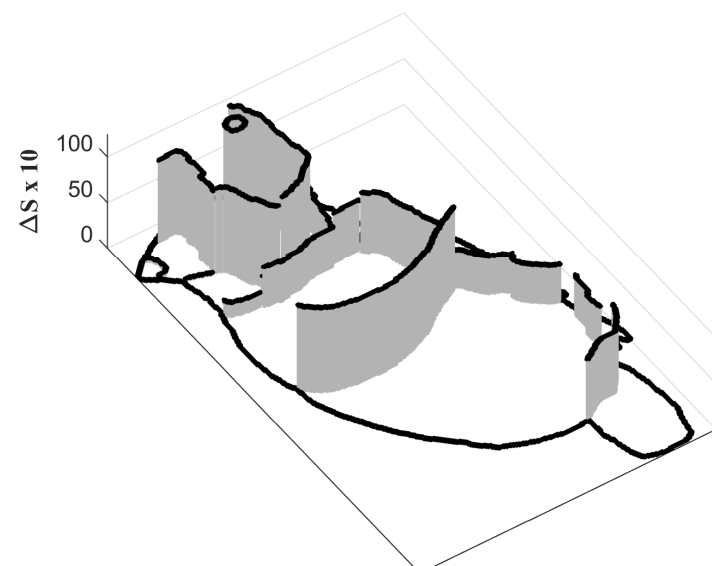

**Male, Red, 3/4 view, Chromatic  $\Delta S$**

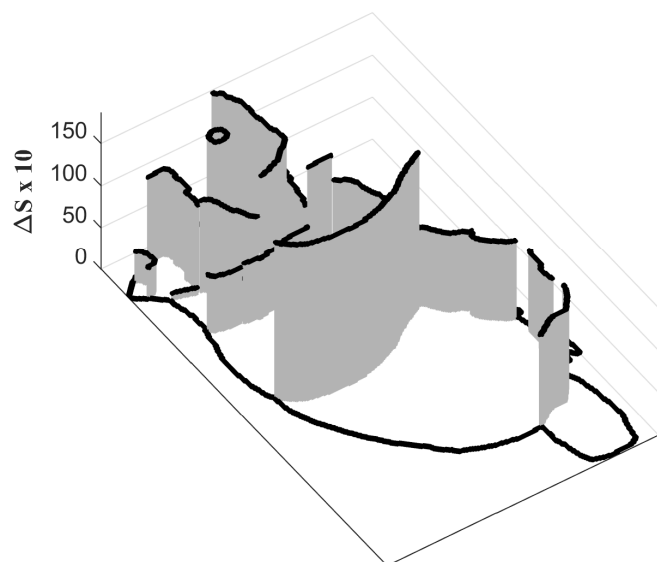

**Female, Red, 3/4 view, Chromatic  $\Delta S$**

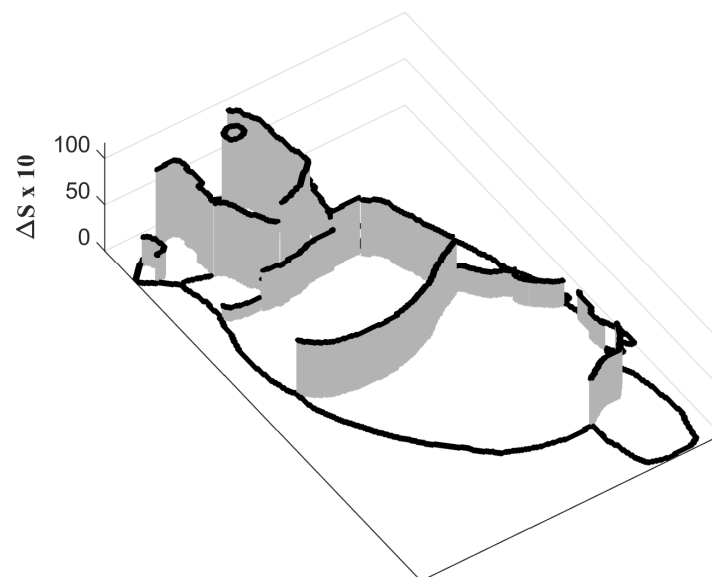

**Male, Black, 3/4 view, Luminance  $\Delta S$**

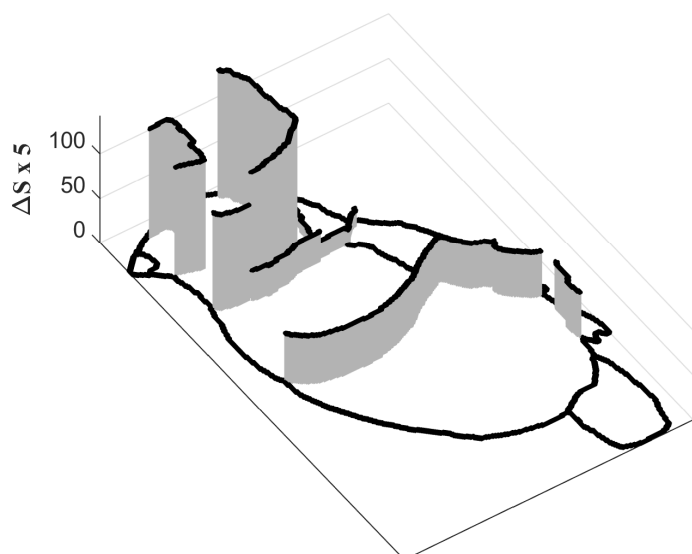

**Female, Black, 3/4 view, Luminance  $\Delta S$**

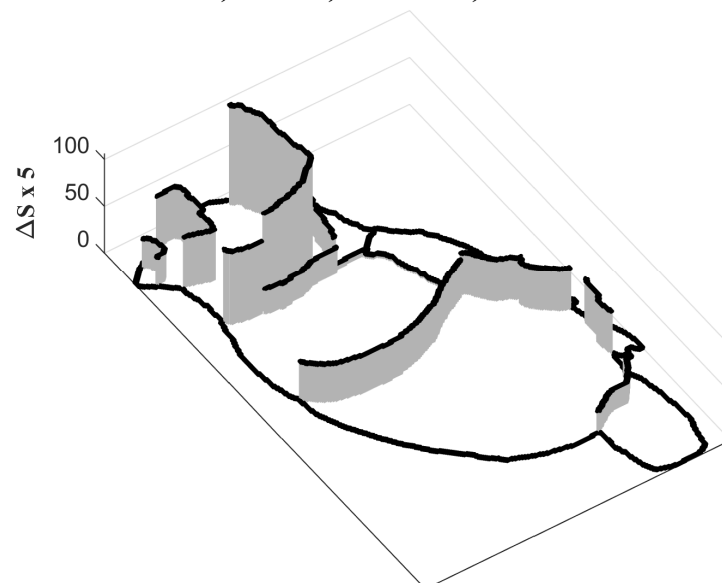

**Male, Golden, 3/4 view, Luminance  $\Delta S$**

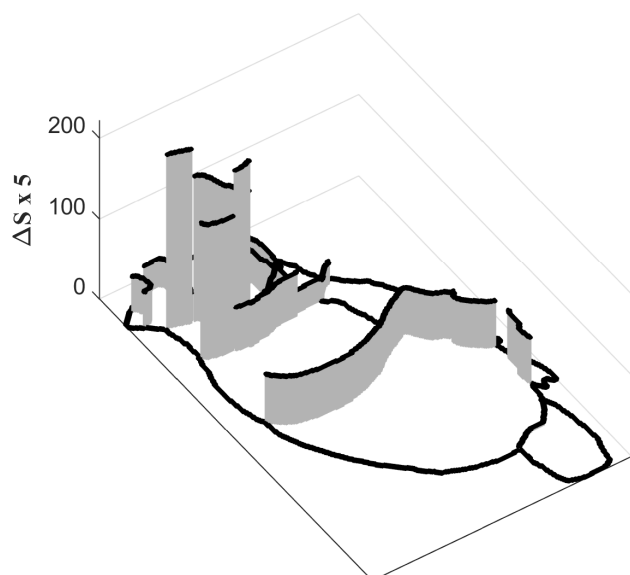

**Female, Golden, 3/4 view, Luminance  $\Delta S$**

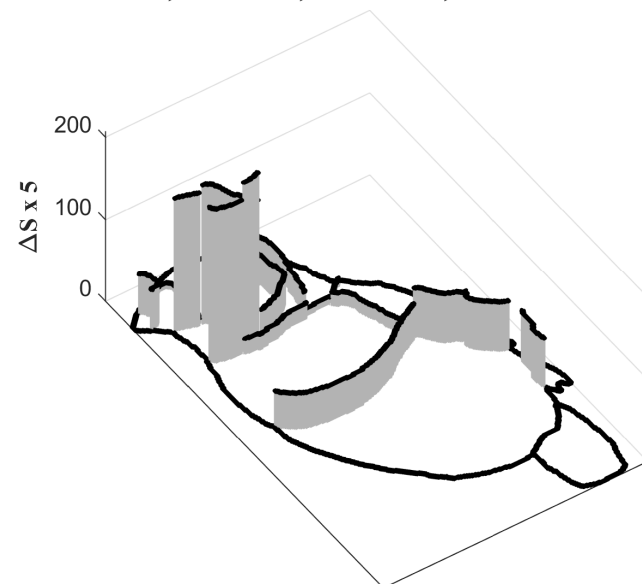

**Male, Red, 3/4 view, Luminance  $\Delta S$**

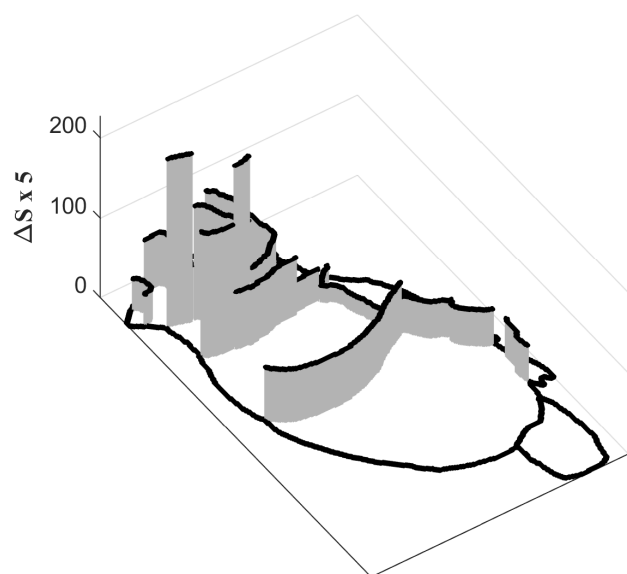

**Female, Red, 3/4 view, Luminance  $\Delta S$**

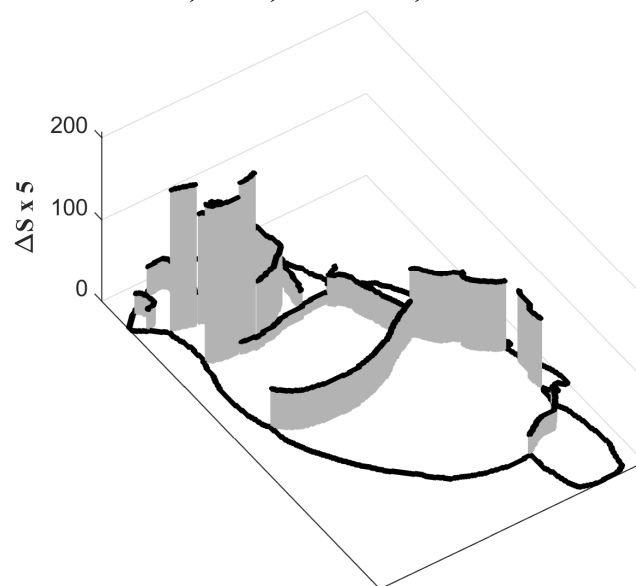

**Male, Black, Side view, Chromatic  $\Delta S$**

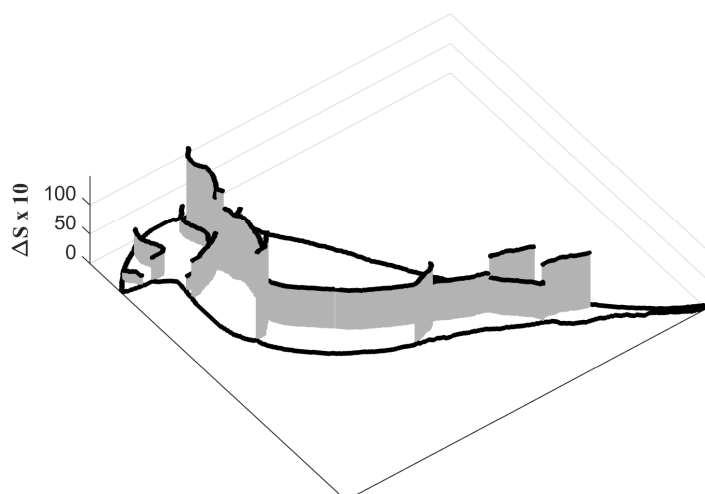

**Female, Black, Side view, Chromatic  $\Delta S$**

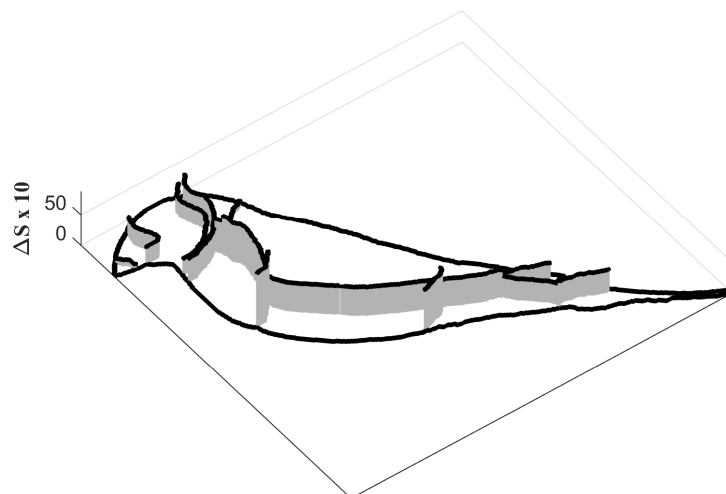

**Male, Golden, Side view, Chromatic  $\Delta S$**

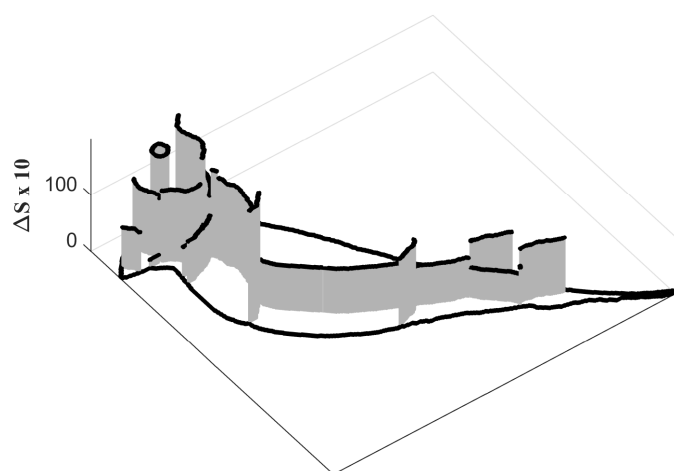

**Female, Golden, Side view, Chromatic  $\Delta S$**

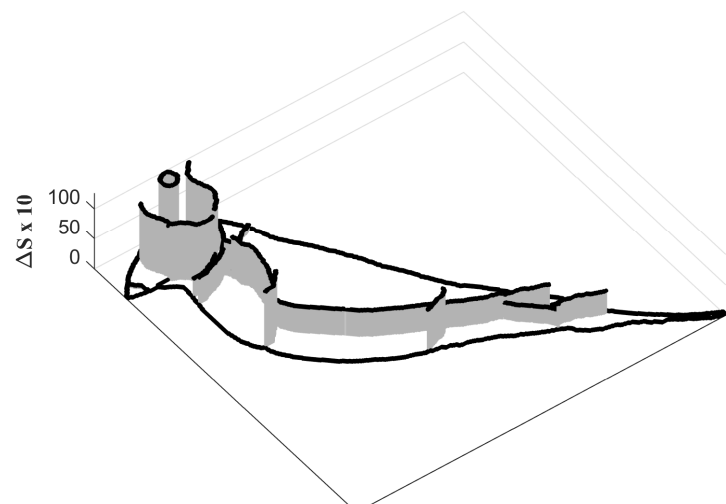

**Male, Red, Side view, Chromatic  $\Delta S$**

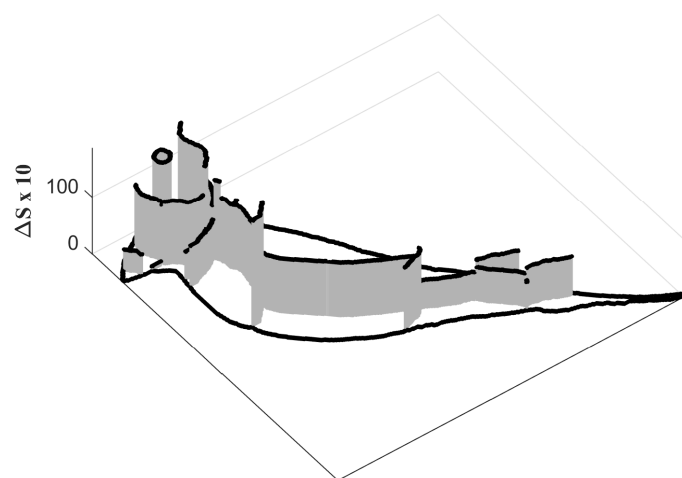

**Female, Red, Side view, Chromatic  $\Delta S$**

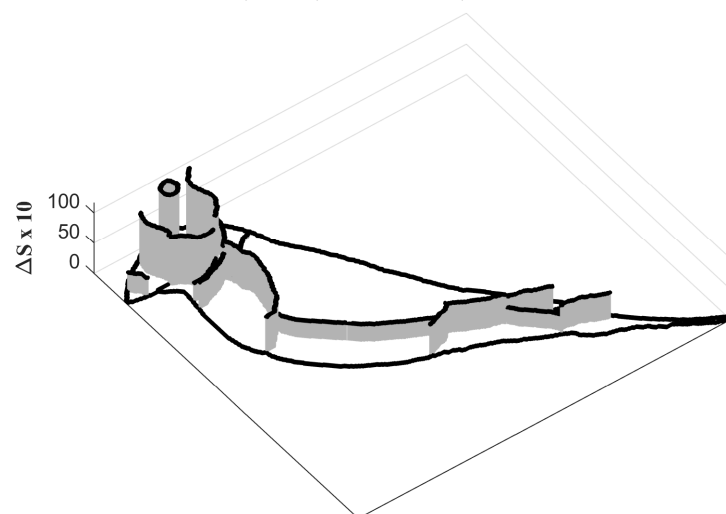

**Male, Black, Side view, Luminance  $\Delta S$**

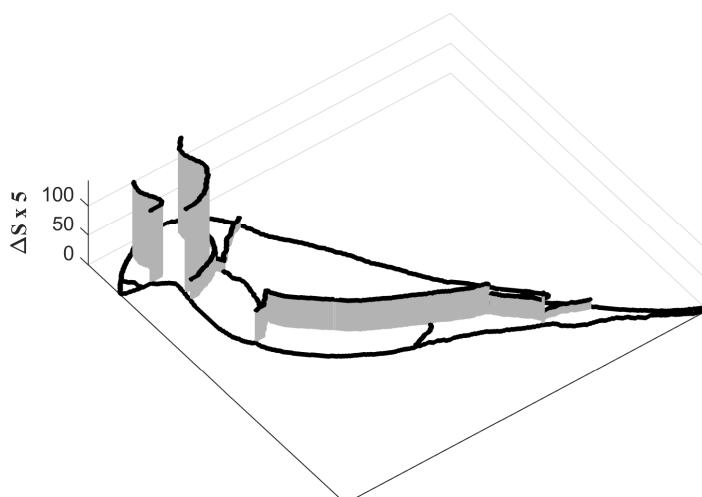

**Female, Black, Side view, Luminance  $\Delta S$**

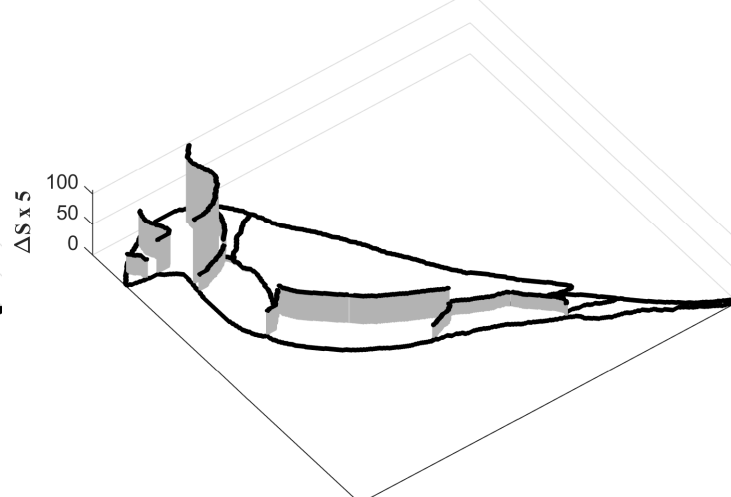

**Male, Golden, Side view, Luminance  $\Delta S$**

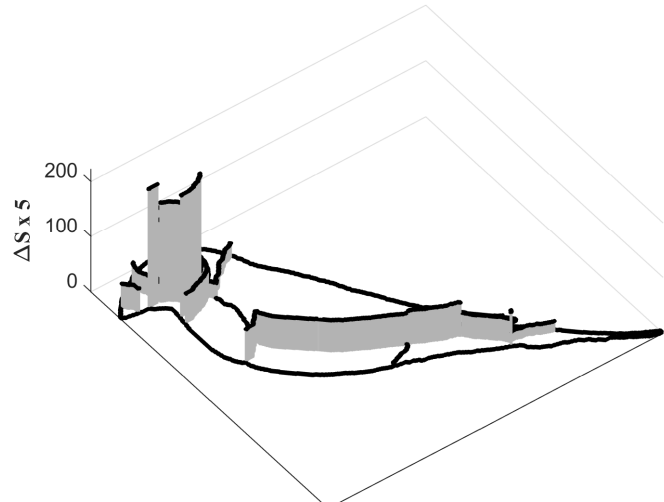

**Female, Golden, Side view, Luminance  $\Delta S$**

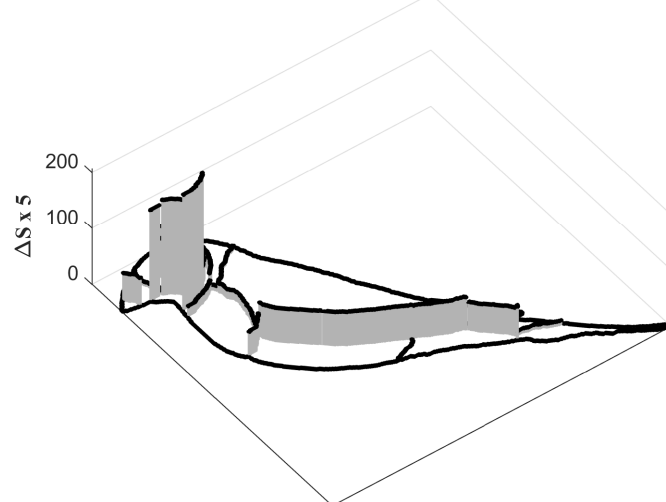

**Male, Red, Side view, Luminance  $\Delta S$**

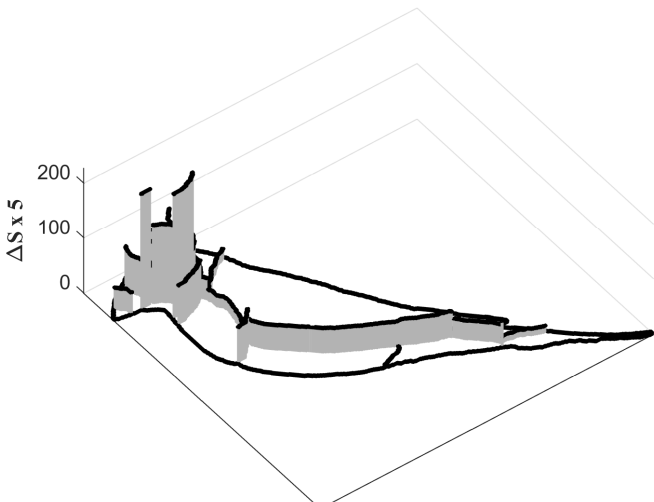

**Female, Red, Side view, Luminance  $\Delta S$**

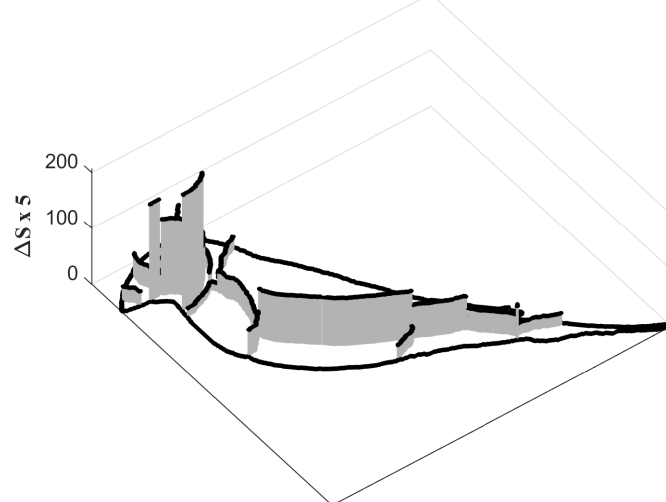



## Gouldian Finch statistics

### Correlation between chr and lum edge deltaS, point per pixels Excluding edges between body and background and eye

| Male r | P    | n  | Female r | P    | n  | Morph & View      |
|--------|------|----|----------|------|----|-------------------|
| -0.405 | 0.19 | 12 | -0.163   | 0.61 | 12 | Black, 3/4 view   |
| -0.397 | 0.14 | 15 | -0.090   | 0.75 | 15 | Black, Side view  |
| -0.363 | 0.18 | 15 | -0.098   | 0.73 | 15 | Golden, 3/4 view  |
| -0.181 | 0.47 | 18 | 0.169    | 0.50 | 18 | Golden, Side view |
| -0.278 | 0.32 | 15 | -0.116   | 0.68 | 15 | Red, 3/4 view     |
| -0.097 | 0.70 | 18 | 0.101    | 0.69 | 18 | Red, Side view    |

#### All possible colour combinations

|        |      |    |       |        |    |                      |
|--------|------|----|-------|--------|----|----------------------|
| -0.081 | 0.56 | 55 | 0.345 | 0.0098 | 55 | Black, all possible  |
| -0.152 | 0.27 | 55 | 0.005 | 0.97   | 55 | Golden, all possible |
| -0.089 | 0.52 | 55 | 0.156 | 0.25   | 55 | Red, all possible    |

#### Difference between correlations on observed and all possible colour combinations

|        |        |                                          |
|--------|--------|------------------------------------------|
| -0.323 | -0.750 | Black, 3/4 view, r actual-all possible   |
| -0.316 | -0.743 | Black, Side view, r actual-all possible  |
| -0.211 | -0.368 | Golden, 3/4 view, r actual-all possible  |
| -0.029 | -0.186 | Golden, Side view, r actual-all possible |
| -0.189 | -0.434 | Red, 3/4 view, r actual-all possible     |
| -0.008 | -0.253 | Red, Side view, r actual-all possible    |

### Mean ( $m_{\Delta S}$ ) and SD ( $s_{\Delta S}$ ) of patch edge chromatic (cr) and luminance (lm) $\Delta S$ , weighted by edge lengths

| Cr $m_{\Delta S}$ | Cr $s_{\Delta S}$ | Lm $m_{\Delta S}$ | SD_Lm | Morph-gender-view         |
|-------------------|-------------------|-------------------|-------|---------------------------|
| 7.56              | 4.97              | 11.07             | 10.43 | Black, Male, 3/4 view     |
| 5.71              | 4.25              | 7.84              | 9.29  | Black, Male, Side view    |
| 4.49              | 2.64              | 8.55              | 6.53  | Black, Female, 3/4 view   |
| 3.19              | 2.21              | 5.78              | 6.50  | Black, Female, Side view  |
| 12.30             | 5.46              | 11.84             | 11.08 | Golden, Male, 3/4 view    |
| 8.58              | 5.55              | 9.75              | 10.91 | Golden, Male, Side view   |
| 6.70              | 3.43              | 9.90              | 10.41 | Golden, Female, 3/4 view  |
| 4.77              | 3.57              | 8.33              | 9.91  | Golden, Female, Side view |
| 11.44             | 4.94              | 12.95             | 9.56  | Red, Male, 3/4 view       |
| 7.96              | 4.95              | 9.68              | 10.10 | Red, Male, Side view      |
| 5.75              | 2.98              | 11.80             | 9.30  | Red, Female, 3/4 view     |
| 4.40              | 3.25              | 9.76              | 9.24  | Red, Female, Side view    |
